# Supplementary material for: Tracheal Morphologic and Protein Alterations Following Short-Term Cigarette Mainstream Smoke Exposure to Rats
Source: PubMed Central journal article supplement — J Toxicol Pathol. 2012 Oct 1;25(3):201–7. doi: 10.1293/tox.25.201 (PMC3434335; doi:10.1293/tox.25.201), 2012-10-01
Supplement: tox-25-201-s001.pdf [file tox-25-201-s001.pdf]

Supplemental Table 1-KinexTM KAM-1.1 800 Antibody

Microarray analysis of pooled trachea tissue lysates from smoke exposed rats.

Averages are from duplicate measurements with the ranges shown as a percentage of the measured signal intensities of the antibody-captured captured dye-labeled proteins in the microarray spots.

%CFC ≥ 200

%CFC ≥ 100

%CFC ≥ 50

%CFC ≥ -50

500 %CFC ≥ -50

200 %CFC ≥ -75

100

50

| Serial No. | Antibody Codes | Target Protein Name | Phospho Site (Human) | Full Target Protein Name                                                                            | Globally Normalized - Trachea Ctrl (M) | %Error Range Trachea Ctrl (M) | Globally Normalized - Trachea Treatment (M) 75 | %Error Range Trachea Treatment (M) 75 | Globally Normalized - Trachea Treatment (M) 200 | %Error Range Trachea Treatment (M) 200 | Globally Normalized - Trachea Treatment (M) 400 | %Error Range Trachea Treatment (M) 400 | Globally Normalized - Trachea Ctrl (F) | %Error Range Trachea Ctrl (F) | Globally Normalized - Trachea Treatment (F) 75 | %Error Range Trachea Treatment (F) 75 | Globally Normalized - Trachea Treatment (F) 200 | %Error Range Trachea Treatment (F) 200 | Globally Normalized - Trachea Treatment (F) 400 | %Error Range Trachea Treatment (F) 400 | %CFC (Trachea Treatment (M) 75 from Trachea Ctrl (M)) | %CFC (Trachea Treatment (M) 200 from Trachea Ctrl (M)) | %CFC (Trachea Treatment (M) 400 from Trachea Ctrl (M)) | %CFC (Trachea Ctrl (F) from Trachea Ctrl (M)) | %CFC (Trachea Treatment (F) 200 from Trachea Ctrl (F)) | %CFC (Trachea Treatment (F) 400 from Trachea Ctrl (F)) | Uniprot Link |    |        |
|------------|----------------|---------------------|----------------------|-----------------------------------------------------------------------------------------------------|----------------------------------------|-------------------------------|------------------------------------------------|---------------------------------------|-------------------------------------------------|----------------------------------------|-------------------------------------------------|----------------------------------------|----------------------------------------|-------------------------------|------------------------------------------------|---------------------------------------|-------------------------------------------------|----------------------------------------|-------------------------------------------------|----------------------------------------|-------------------------------------------------------|--------------------------------------------------------|--------------------------------------------------------|-----------------------------------------------|--------------------------------------------------------|--------------------------------------------------------|--------------|----|--------|
| 1          | NN001          | 14-3-3 z            | Pan-specific         | 14-3-3 protein zeta (cross-reacts with other isoforms)                                              | 10193                                  | 31                            | 7137                                           | 8                                     | 11201                                           | 26                                     | 4090                                            | 72                                     | 18738                                  | 85                            | 9958                                           | 72                                    | 6993                                            | 13                                     | 6786                                            | 52                                     | -30                                                   | 10                                                     | -60                                                    | -47                                           | -63                                                    | -64                                                    | P63104       |    |        |
| 2          | PN001          | 4E-BP1              | S64                  | Eukaryotic translation initiation factor 4E binding protein 1 (PHAS1)                               | 22392                                  | 7                             | 19210                                          | 74                                    | 8765                                            | 6                                      | 22039                                           | 7                                      | 21101                                  | 9                             | 22754                                          | 27                                    | 17554                                           | 43                                     | 16449                                           | 10                                     | -14                                                   | -61                                                    | -2                                                     | -8                                            | -17                                                    | -22                                                    | Q13541       |    |        |
| 3          | PN114          | 4E-BP1              | T45                  | Eukaryotic translation initiation factor 4E binding protein 1 (PHAS1)                               | 3657                                   | 39                            | 3906                                           | 66                                    | 4257                                            | 8                                      | 3823                                            | 10                                     | 3352                                   | 10                            | 4524                                           | 10                                    | 4700                                            | 23                                     | 7                                               | 17                                     | 81                                                    | -5                                                     | -78                                                    | -88                                           | -67                                                    | Q13541                                                 |              |    |        |
| 4          | PN128          | 4E-BP1              | T69                  | Eukaryotic translation initiation factor 4E binding protein 1 (PHAS1)                               | 7590                                   | 1222                          | 2047                                           | 38                                    | 1466                                            | 24                                     | 1466                                            | 24                                     | 1752                                   | 45                            | 1609                                           | 21                                    | 1158                                            | 28                                     | 1559                                            | 18                                     | -73                                                   | -81                                                    | -49                                                    | -74                                           | -10                                                    | Q13541                                                 |              |    |        |
| 5          | NK001          | Abi                 | Pan-specific         | Abelson proto-oncogene-encoded protein-tyrosine kinase                                              | 8191                                   | 1                             | 6752                                           | 5                                     | 8132                                            | 23                                     | 5496                                            | 0                                      | 6764                                   | 14                            | 5228                                           | 18                                    | 8190                                            | 6                                      | 6820                                            | 2                                      | -18                                                   | -1                                                     | -33                                                    | -23                                           | 21                                                     | 1                                                      | P00519       |    |        |
| 6          | PN002          | AcCoA carboxylase   | S80                  | Acetyl coenzyme A carboxylase                                                                       | 8955                                   | 117                           | 14175                                          | 30                                    | 11260                                           | 34                                     | 10550                                           | 27                                     | 19711                                  | 109                           | 9724                                           | 51                                    | 13667                                           | 61                                     | 17766                                           | 11                                     | 58                                                    | 26                                                     | 18                                                     | -51                                           | -31                                                    | -10                                                    | Q13085       |    |        |
| 7          | NN135-1        | Acetylated Lysine   | Pan-specific         | Acetylated Lysine                                                                                   | 30949                                  | 4                             | 21768                                          | 2                                     | 29625                                           | 2                                      | 24747                                           | 3                                      | 32277                                  | 1                             | 36716                                          | 23                                    | 28513                                           | 4                                      | 23309                                           | 21                                     | -30                                                   | -4                                                     | -20                                                    | 14                                            | -12                                                    | -28                                                    | NA           |    |        |
| 8          | NN135-2        | Acetylated Lysine   | Pan-specific         | Acetylated Lysine                                                                                   | 3939                                   | 44                            | 8162                                           | 3                                     | 2697                                            | 1                                      | 4179                                            | 52                                     | 11968                                  | 61                            | 6049                                           | 5                                     | 4165                                            | 8                                      | 10349                                           | 75                                     | 107                                                   | -32                                                    | -2                                                     | 6                                             | -49                                                    | -65                                                    | -15          | NA |        |
| 9          | NK002          | ADD1                | Pan-specific         | Activated p21cdc42Hs protein-serine kinase                                                          | 13302                                  | 58                            | 10638                                          | 7                                     | 8725                                            | 4                                      | 7384                                            | 5                                      | 9623                                   | 5                             | 4550                                           | 43                                    | 5600                                            | 6                                      | 5655                                            | 4                                      | -20                                                   | -34                                                    | -44                                                    | -53                                           | -42                                                    | -41                                                    | Q07912       |    |        |
| 10         | PN003-PN004    | Adducin a, g        | S726, S693           | Adducin alpha (ADD1)/gamma (ADD3)                                                                   | 1599                                   | 12                            | 7630                                           | 35                                    | 3924                                            | 41                                     | 7308                                            | 27                                     | 9838                                   | 53                            | 6498                                           | 34                                    | 4242                                            | 26                                     | 5811                                            | 8                                      | 36                                                    | -30                                                    | 30                                                     | -34                                           | -57                                                    | -41                                                    | P05611       |    |        |
| 11         | NN002          | AIF                 | Pan-specific         | Apoptosis inducing factor (programmed cell death protein 8) (PDCD8)                                 | 10377                                  | 14                            | 7956                                           | 9                                     | 7111                                            | 23                                     | 5845                                            | 19                                     | 11077                                  | 22                            | 7164                                           | 16                                    | 4847                                            | 29                                     | 5367                                            | 5                                      | -23                                                   | -31                                                    | -44                                                    | -35                                           | -58                                                    | -52                                                    | Q09831       |    |        |
| 12         | NN003          | AK2                 | Pan-specific         | Adenylate kinase 2                                                                                  | 3077                                   | 95                            | 13390                                          | 11                                    | 3820                                            | 31                                     | 11603                                           | 7                                      | 6796                                   | 46                            | 16764                                          | 43                                    | 2826                                            | 71                                     | 9678                                            | 101                                    | 335                                                   | 24                                                     | 277                                                    | 147                                           | -58                                                    | 42                                                     | P54919       |    |        |
| 13         | NN003          | AKK                 | Pan-specific         | Anaplastic lymphoma kinase                                                                          | 47313                                  | 2                             | 16812                                          | 1                                     | 20207                                           | 1                                      | 16613                                           | 4                                      | 39234                                  | 3                             | 12079                                          | 3                                     | 55113                                           | 2                                      | 16667                                           | 2                                      | -64                                                   | -57                                                    | -65                                                    | -69                                           | 40                                                     | -58                                                    | Q98040       |    |        |
| 14         | NK004          | ALS2CR7 (PFTAIRE2)  | Pan-specific         | Alzheimers lateral sclerosis 2 chromosomal region candidate gene protein-serine kinase 7            | 7074                                   | 176                           | 8067                                           | 23                                    | 3015                                            | 22                                     | 3178                                            | 53                                     | 3787                                   | 84                            | 2744                                           | 1                                     | 2587                                            | 5                                      | 48341                                           | 7                                      | -14                                                   | -57                                                    | -45                                                    | -32                                           | -32                                                    | 27                                                     | Q98740       |    |        |
| 15         | PK002          | AMPK1/2             | T183                 | 5-AMP-activated protein kinase subunit alpha 1/2                                                    | 1854                                   | 33                            | 1605                                           | 33                                    | 1364                                            | 37                                     | 2009                                            | 0                                      | 1375                                   | 14                            | 1407                                           | 42                                    | 1364                                            | 25                                     | -30                                             | -32                                    | -30                                                   | -32                                                    | -30                                                    | -32                                           | -30                                                    | -32                                                    | Q13131       |    |        |
| 16         | NK006          | ANKRD3              | Pan-specific         | Ankyrin repeat domain protein-serine kinase 3 (RIPK4, DIK)                                          | 11447                                  | 11                            | 16848                                          | 28                                    | 8670                                            | 47                                     | 7048                                            | 65                                     | 17119                                  | 90                            | 10897                                          | 14                                    | 6717                                            | 14                                     | 14360                                           | 11                                     | -47                                                   | -24                                                    | -38                                                    | -36                                           | -61                                                    | -16                                                    | P57078       |    |        |
| 17         | NN004          | APG1                | Pan-specific         | Hsp 70-related heat shock protein 1 (osmotic stress protein 94) (OSP94)                             | 8138                                   | 25                            | 6028                                           | 10                                    | 4306                                            | 41                                     | 6417                                            | 9                                      | 11564                                  | 130                           | 6624                                           | 79                                    | 3565                                            | 66                                     | 2848                                            | 26                                     | 27                                                    | -47                                                    | -21                                                    | -43                                           | -69                                                    | -75                                                    | O95757       |    |        |
| 18         | NN122          | APG2                | Pan-specific         | Hsp 70-related heat shock protein 4 (HSP70R4)                                                       | 10070                                  | 7                             | 6824                                           | 33                                    | 7605                                            | 10                                     | 6589                                            | 9                                      | 10372                                  | 10                            | 3324                                           | 189                                   | 6241                                            | 7                                      | 3453                                            | 59                                     | -32                                                   | -24                                                    | -35                                                    | -68                                           | -40                                                    | -67                                                    | P49432       |    |        |
| 19         | NN121          | Arrestin b1         | Pan-specific         | Arrestin beta 1                                                                                     | 44935                                  | 10                            | 31720                                          | 22                                    | 36222                                           | 21                                     | 42956                                           | 9                                      | 41690                                  | 0                             | 28410                                          | 37                                    | 51641                                           | 1                                      | 28344                                           | 28                                     | -29                                                   | -19                                                    | -4                                                     | -32                                           | 24                                                     | -32                                                    | P49407       |    |        |
| 20         | PN133          | Arrestin b1         | S412                 | Arrestin beta 1                                                                                     | 44920                                  | 4                             | 16027                                          | 10                                    | 13111                                           | 12                                     | 11674                                           | 16                                     | 25244                                  | 8                             | 10698                                          | 2                                     | 41861                                           | 12                                     | 13734                                           | 2                                      | -64                                                   | -71                                                    | -74                                                    | -58                                           | -66                                                    | -46                                                    | P49407       |    |        |
| 21         | NK007          | ASK1 (MAP3K5)       | Pan-specific         | Apoptosis signal regulating protein-serine kinase                                                   | 9005                                   | 6                             | 9286                                           | 21                                    | 6664                                            | 31                                     | 6326                                            | 25                                     | 10400                                  | 34                            | 5117                                           | 27                                    | 5053                                            | 140                                    | 6054                                            | 5                                      | 3                                                     | -26                                                    | -30                                                    | -51                                           | -51                                                    | -42                                                    | Q99683       |    |        |
| 22         | NK007-2        | ASK1 (MAP3K5)       | Pan-specific         | Apoptosis signal regulating protein-serine kinase                                                   | 6942                                   | 8                             | 14190                                          | 10                                    | 6618                                            | 40                                     | 9135                                            | 73                                     | 14322                                  | 138                           | 20594                                          | 70                                    | 4220                                            | 12                                     | 12449                                           | 23                                     | 104                                                   | -5                                                     | 32                                                     | 44                                            | -71                                                    | -13                                                    | Q99683       |    |        |
| 23         | PK118          | ASK1 (MAP3K5)       | S1046                | Apoptosis signal regulating protein-serine kinase                                                   | 2130                                   | 46                            | 3566                                           | 19                                    | 3777                                            | 22                                     | 2695                                            | 24                                     | 5765                                   | 40                            | 2193                                           | 28                                    | 3180                                            | 16                                     | 3179                                            | 36                                     | 67                                                    | -77                                                    | 27                                                     | -62                                           | -45                                                    | -45                                                    | Q99683       |    |        |
| 24         | NN160          | ATF2                | Pan-specific         | Activating transcription factor 2 (CRE-BP1)                                                         | 1089                                   | 11                            | 2913                                           | 59                                    | 1075                                            | 17                                     | 922                                             | 18                                     | 1445                                   | 53                            | 1715                                           | 34                                    | 1236                                            | 22                                     | 1850                                            | 46                                     | 168                                                   | -1                                                     | -15                                                    | 19                                            | -14                                                    | 28                                                     | P15336       |    |        |
| 25         | PN003-1        | ATF2                | T183                 | Activating transcription factor 2 (CRE-BP1)                                                         | 2960                                   | 8                             | 2805                                           | 4                                     | 2805                                            | 4                                      | 2805                                            | 4                                      | 2805                                   | 4                             | 2805                                           | 4                                     | 2805                                            | 4                                      | 2805                                            | 4                                      | -5                                                    | -39                                                    | 23                                                     | -17                                           | 24                                                     | -7                                                     | P15336       |    |        |
| 26         | PN006-1        | ATF2                | T69/T71              | Activating transcription factor 2 (CRE-BP1)                                                         | 43405                                  | 1                             | 17840                                          | 4                                     | 17428                                           | 3                                      | 18416                                           | 2                                      | 35865                                  | 25                            | 13043                                          | 19                                    | 51189                                           | 6                                      | 15730                                           | 4                                      | -59                                                   | -60                                                    | -56                                                    | -64                                           | -43                                                    | -56                                                    | P15336       |    |        |
| 27         | NK008-1        | Aurora A (AIK)      | Pan-specific         | Aurora Kinase A (serine/threonine protein kinase 6)                                                 | 10188                                  | 82                            | 20281                                          | 42                                    | 4936                                            | 191                                    | 11315                                           | 17                                     | 7515                                   | 73                            | 24792                                          | 35                                    | 6354                                            | 15                                     | 17534                                           | 9                                      | 99                                                    | -52                                                    | 11                                                     | 230                                           | -15                                                    | 133                                                    | O14965       |    |        |
| 28         | NK008-2        | Aurora A (AIK)      | Pan-specific         | Aurora Kinase A (serine/threonine protein kinase 6)                                                 | 15721                                  | 252                           | 6993                                           | 20                                    | 6729                                            | 44                                     | 4437                                            | 79                                     | 6505                                   | 14                            | 5075                                           | 21                                    | 4072                                            | 53                                     | 4770                                            | 55                                     | -56                                                   | -57                                                    | -72                                                    | -22                                           | -37                                                    | -27                                                    | O14965       |    |        |
| 29         | NK193          | Aurora B (AIK-1)    | Pan-specific         | Aurora Kinase B (serine/threonine protein kinase 12)                                                | 5487                                   | 61                            | 27435                                          | 37                                    | 7284                                            | 24                                     | 12912                                           | 21                                     | 5432                                   | 30                            | 7352                                           | 42                                    | 7818                                            | 78                                     | 15749                                           | 24                                     | 400                                                   | 33                                                     | 135                                                    | 35                                            | 44                                                     | 190                                                    | Q96GD4       |    |        |
| 30         | NK009          | Aurora C (AIK-3)    | Pan-specific         | Aurora Kinase C (serine/threonine protein kinase 13)                                                | 2732                                   | 6                             | 3181                                           | 1                                     | 2329                                            | 6                                      | 1839                                            | 1                                      | 5805                                   | 42                            | 2893                                           | 22                                    | 1930                                            | 36                                     | 3614                                            | 52                                     | 16                                                    | -15                                                    | -33                                                    | -24                                           | -49                                                    | -5                                                     | Q9UCB9       |    |        |
| 31         | NN100          | Axl                 | Pan-specific         | Axl proto-oncogene-encoded protein-tyrosine kinase                                                  | 2180                                   | 2                             | 2508                                           | 45                                    | 2074                                            | 43                                     | 2226                                            | 14                                     | 2363                                   | 23                            | 1650                                           | 9                                     | 1635                                            | 53                                     | 2437                                            | 2                                      | 15                                                    | -5                                                     | 2                                                      | -30                                           | -31                                                    | 3                                                      | P30530       |    |        |
| 32         | PK045-PN007    | MEK1/2+B23 (NPM)    | S217+S221, S4        | MAPK/ERK protein-serine kinase 1/2 (MKK1/2) + B23 (nucleophosmin, numatrin, nucleolar protein NO38) | 1263                                   | 18                            | 1192                                           | 30                                    | 998                                             | 45                                     | 901                                             | 37                                     | 1062                                   | 6                             | 1213                                           | 32                                    | 919                                             | 45                                     | 1139                                            | 32                                     | -6                                                    | -21                                                    | -29                                                    | 14                                            | -13                                                    | 7                                                      | Q07480       |    |        |
| 33         | PN008          | B23 (NPM)           | T199                 | B23 (nucleophosmin, numatrin, nucleolar protein NO38)                                               | 40668                                  | 12                            | 21814                                          | 25                                    | 32817                                           | 23                                     | 40205                                           | 2                                      | 34185                                  | 1                             | 28223                                          | 26                                    | 46272                                           | 0                                      | 26160                                           | 7                                      | -46                                                   | -19                                                    | -1                                                     | -17                                           | 35                                                     | -23                                                    | P06748       |    |        |
| 34         | PN008-2        | B23 (NPM)           | T199                 | B23 (nucleophosmin, numatrin, nucleolar protein NO38)                                               | 1145                                   | 56                            | 1811                                           | 10                                    | 974                                             | 34                                     | 1222                                            | 12                                     | 1894                                   | 24                            | 1816                                           | 8                                     | 1478                                            | 75                                     | 1297                                            | 1                                      | 58                                                    | -15                                                    | 7                                                      | -4                                            | -22                                                    | -11                                                    | Q07480       |    |        |
| 35         | PN009          | B23 (NPM)           | T234/T237            | B23 (nucleophosmin, numatrin, nucleolar protein NO38)                                               | 39608                                  | 1                             | 30627                                          | 6                                     | 26422                                           | 15                                     | 39649                                           | 2                                      | 36198                                  | 6                             | 26321                                          | 8                                     | 46778                                           | 4                                      | 45068                                           | 3                                      | -23                                                   | -33                                                    | 1                                                      | -7                                            | -29                                                    | -11                                                    | P51913       |    |        |
| 36         | PN010          | Bad                 | S15                  | Bcl2-antagonist of cell death protein                                                               | 21316                                  | 6                             | 14508                                          | 9                                     | 19080                                           | 1                                      | 38196                                           | 12                                     | 13936                                  | 9                             | 9                                              | 53470                                 | 2                                               | -53                                    | 40                                              | -58                                    | -64                                                   | -60                                                    | -40                                                    | -58                                           | Q02934                                                 |                                                        |              |    |        |
| 37         | PN012-1        | Bad                 | S99                  | Bcl2-antagonist of cell death protein                                                               | 2207                                   | 3                             | 3140                                           | 11                                    | 2597                                            | 37                                     | 2200                                            | 23                                     | 4044                                   | 50                            | 4042                                           | 262                                   | 2134                                            | 20                                     | 3057                                            | 15                                     | 42                                                    | 18                                                     | 0                                                      | 0                                             | -47                                                    | -24                                                    | Q02934       |    |        |
| 38         | NN000          | Bak                 | Pan-specific         | Bcl2 homologous antagonist/killer (BCL2L1)                                                          | 15071                                  | 6                             | 10985                                          | 4                                     | 10273                                           | 3                                      | 9182                                            | 8                                      | 11503                                  | 0                             | 8842                                           | 9                                     | 9820                                            | 24                                     | 9458                                            | 12                                     | -27                                                   | -32                                                    | -39                                                    | -23                                           | -15                                                    | -18                                                    | O16611       |    |        |
| 39         | NN005          | Bax                 | Pan-specific         | Apoptosis regulator Bcl2-associated X protein                                                       | 12791                                  | 34                            | 12062                                          | 14                                    | 16899                                           | 2                                      | 9769                                            | 1                                      | 10180                                  | 12                            | 7464                                           | 18                                    | 11074                                           | 5                                      | 10480                                           | 10                                     | -6                                                    | 10480                                                  | 10                                                     | -32                                           | -24                                                    | -27                                                    | 9            | 3  | Q07812 |
| 40         | NN006          | Bcl2                | Pan-specific         | B-cell lymphoma protein 2 alpha                                                                     | 2430                                   | 16                            | 2619                                           | 4                                     | 2293                                            | 58                                     | 2300                                            | 3                                      | 3621                                   | 20                            | 2542                                           | 10                                    | 2404                                            | 1                                      | 2778                                            | 1                                      | 8                                                     | -6                                                     | -5                                                     | -31                                           | -34                                                    | -23                                                    | P10415       |    |        |
| 41         | NN007          | Bcl-xL              | Pan-specific         | Bcl2-like protein 1                                                                                 | 31957                                  | 18                            | 37766                                          | 6                                     | 19297                                           | 3                                      | 31160                                           | 4                                      | 33983                                  | 10                            | 24314                                          | 51                                    | 40699                                           | 6                                      | 31874                                           | 39                                     | 18                                                    | -40                                                    | -2                                                     | -28                                           | 20                                                     | -6                                                     | Q07817       |    |        |
| 42         | NN008          | Bcl-xS/L            | Pan-specific         | Bcl-xS/L                                                                                            | 15900                                  | 2                             | 17643                                          | 3                                     | 15652                                           | 8                                      | 12732                                           | 2                                      | 16722                                  | 9                             | 10236                                          | 24                                    | 14045                                           | 5                                      | 14213                                           | 2                                      | 11                                                    | -2                                                     | -20                                                    | -39                                           | -16                                                    | -15                                                    | Q07817       |    |        |
| 43         | NN009          | Bid                 | Pan-specific         | BH3 interacting domain death agonist                                                                | 18713                                  | 65                            | 10000                                          | 6                                     | 5305                                            | 115                                    | 7842                                            | 9                                      | 1                                      |                               |                                                |                                       |                                                 |                                        |                                                 |                                        |                                                       |                                                        |                                                        |                                               |                                                        |                                                        |              |    |        |

|     |         |                     |           |              |                                                                                                                       |       |     |       |     |       |     |       |     |       |     |       |     |       |     |       |     |     |     |     |     |     |        |        |        |
|-----|---------|---------------------|-----------|--------------|-----------------------------------------------------------------------------------------------------------------------|-------|-----|-------|-----|-------|-----|-------|-----|-------|-----|-------|-----|-------|-----|-------|-----|-----|-----|-----|-----|-----|--------|--------|--------|
| 117 | NK029   | CDK6                |           | Pan-specific | Cyclin-dependent protein-serine kinase 6                                                                              | 5636  | 12  | 5480  | 31  | 5783  | 29  | 5932  | 36  | 6638  | 18  | 12052 | 67  | 13572 | 83  | 5337  | 33  | -3  | 3   | 5   | 82  | 104 | -20    | Q00534 |        |
| 118 | NK029-2 | CDK6                |           | Pan-specific | Cyclin-dependent protein-serine kinase 6                                                                              | 2257  | 6   | 4883  | 43  | 2538  | 6   | 4108  | 122 | 2566  | 27  | 2407  | 39  | 2525  | 134 | 2067  | 5   | 116 | 12  | 82  | -6  | -2  | -19    | Q00534 |        |
| 119 | NK029-3 | CDK6                |           | Pan-specific | Cyclin-dependent protein-serine kinase 6                                                                              | 9627  | 9   | 17332 | 393 | 7131  | 32  | 5211  | 20  | 9186  | 31  | 6166  | 53  | 7248  | 28  | 4860  | 19  | 916 | 80  | -26 | -46 | -33 | -21    | -47    | Q00534 |
| 120 | NK030-1 | CDK7                |           | Pan-specific | Cyclin-dependent protein-serine kinase 7                                                                              | 1041  | 13  | 1780  | 35  | 1190  | 112 | 1421  | 54  | 1076  | 26  | 1451  | 39  | 751   | 36  | 1096  | 15  | 71  | 14  | 36  | 35  | -30 | 2      | P50613 |        |
| 121 | NK030-2 | CDK7                |           | Pan-specific | Cyclin-dependent protein-serine kinase 7                                                                              | 11243 | 14  | 4017  | 52  | 5614  | 82  | 5446  | 72  | 8001  | 3   | 3846  | 54  | 7971  | 42  | 2529  | 26  | -64 | -50 | -52 | -52 | 0   | -68    | P50613 |        |
| 122 | NK030-3 | CDK7                |           | Pan-specific | Cyclin-dependent protein-serine kinase 7                                                                              | 1111  | 16  | 2327  | 26  | 1506  | 34  | 1799  | 111 | 1695  | 2   | 1943  | 34  | 943   | 53  | 1662  | 19  | 109 | 36  | 62  | 15  | -44 | -2     | P50613 |        |
| 123 | NK031-2 | CDK8                |           | Pan-specific | Cyclin-dependent protein-serine kinase 8                                                                              | 4637  | 25  | 5551  | 119 | 3097  | 26  | 3056  | 34  | 4604  | 26  | 3088  | 1   | 3641  | 47  | 3634  | 17  | 20  | -33 | -34 | -33 | -23 | -21    | P49336 |        |
| 124 | NK031-3 | CDK8                |           | Pan-specific | Cyclin-dependent protein-serine kinase 8                                                                              | 2187  | 47  | 2636  | 3   | 1768  | 22  | 1552  | 2   | 2820  | 31  | 2159  | 61  | 1913  | 59  | 3078  | 17  | 21  | -19 | -29 | -23 | -32 | 9      | P49336 |        |
| 125 | NK031-5 | CDK8                |           | Pan-specific | Cyclin-dependent protein-serine kinase 8                                                                              | 40824 | 7   | 10824 | 3   | 3239  | 26  | 3443  | 3   | 6241  | 139 | 5904  | 18  | 3078  | 17  | 49    | -63 | -46 | -70 | -13 | -38 | -7  | -59    | P49336 |        |
| 126 | NK031-4 | CDK8                |           | Pan-specific | Cyclin-dependent protein-serine kinase 8                                                                              | 2145  | 26  | 3118  | 36  | 1674  | 81  | 1868  | 18  | 1794  | 19  | 1229  | 17  | 1477  | 42  | 1916  | 19  | 45  | -2  | -12 | -28 | -3  | -10    | P50613 |        |
| 127 | NK032   | CDK9                |           | Pan-specific | Cyclin-dependent protein-serine kinase 9                                                                              | 14604 | 4   | 7315  | 3   | 10440 | 21  | 8554  | 54  | 12023 | 4   | 5561  | 0   | 7319  | 10  | 7708  | 17  | -50 | -29 | -41 | -54 | -39 | -36    | P50750 |        |
| 128 | NK199   | CDKL1               |           | Pan-specific | Cyclin-dependent kinase-like 1                                                                                        | 824   | 24  | 1301  | 6   | 1302  | 19  | 771   | 61  | 1192  | 6   | 749   | 34  | 1137  | 0   | 965   | 26  | 58  | -6  | -37 | -5  | -19 | Q00532 |        |        |
| 129 | NK034   | Chk1                |           | Pan-specific | Checkpoint protein-serine kinase 1                                                                                    | 13022 | 0   | 24765 | 4   | 8422  | 40  | 23215 | 14  | 16774 | 38  | 22602 | 30  | 14034 | 24  | 19230 | 18  | 90  | -35 | 78  | 35  | -16 | 15     | O14757 |        |
| 130 | NK034-2 | Chk1                |           | Pan-specific | Checkpoint protein-serine kinase 1                                                                                    | 10919 | 12  | 4462  | 16  | 4784  | 9   | 3089  | 17  | 10546 | 10  | 3502  | 48  | 4965  | 117 | 1625  | 4   | -59 | -66 | -72 | -67 | -53 | -85    | O14757 |        |
| 131 | NK035   | Chk2                |           | Pan-specific | Checkpoint protein-serine kinase 2                                                                                    | 9592  | 54  | 7521  | 3   | 7094  | 56  | 4990  | 86  | 12584 | 2   | 6006  | 18  | 2738  | 17  | 2701  | 25  | -22 | -26 | -48 | -52 | -78 | -75    | O96017 |        |
| 132 | PK119   | Chk2                | T68       |              | Checkpoint protein-serine kinase 2                                                                                    | 1355  | 99  | 2408  | 33  | 2353  | 20  | 10504 | 726 | 8136  | 33  | 1504  | 15  | 1174  | 33  | 2026  | 16  | 78  | 74  | 675 | -82 | -86 | -75    | O96017 |        |
| 133 | NN025   | c-IAP1              |           | Pan-specific | Cellular inhibitor of apoptosis protein 1 (baculoviral IAP repeat-containing protein 3, apoptosis inhibitor 2 (API2)) | 7958  | 10  | 5691  | 30  | 4166  | 98  | 1870  | 9   | 8145  | 5   | 2926  | 13  | 3999  | 85  | 1939  | 41  | -28 | -48 | -77 | -64 | -51 | -76    | Q13490 |        |
| 134 | NK036   | CK1d                |           | Pan-specific | Casein protein-serine kinase 1 delta                                                                                  | 11523 | 13  | 7153  | 2   | 10542 | 12  | 6166  | 23  | 10923 | 0   | 6256  | 24  | 9450  | 2   | 6709  | 18  | -38 | -50 | -9  | -46 | -43 | -13    | -39    | P48730 |
| 135 | NK037   | CK1e                |           | Pan-specific | Casein protein-serine kinase 1 epsilon                                                                                | 43461 | 17  | 32642 | 28  | 17681 | 2   | 41213 | 2   | 38395 | 14  | 34881 | 2   | 45146 | 18  | 26396 | 0   | -25 | -69 | -5  | -9  | -18 | -31    | P49674 |        |
| 136 | NK198   | CK1e                |           | Pan-specific | Casein protein-serine kinase 1 epsilon                                                                                | 1244  | 89  | 1506  | 3   | 1155  | 53  | 1052  | 39  | 1604  | 49  | 4065  | 32  | 1319  | 15  | 547   | 4   | 21  | -7  | -15 | -4  | -6  | 18     | -66    | Q00143 |
| 137 | NK040   | CK1g2               |           | Pan-specific | Casein protein-serine kinase 1 gamma 2                                                                                | 1692  | 56  | 2293  | 21  | 1592  | 40  | 1934  | 4   | 1883  | 8   | 1782  | 12  | 1229  | 21  | 1800  | 32  | 36  | -6  | -14 | -5  | -35 | -4     | P73888 |        |
| 138 | NK041   | CK2a                |           | Pan-specific | Casein protein-serine kinase 2 alpha/alpha prime                                                                      | 1587  | 94  | 1953  | 25  | 833   | 38  | 1239  | 26  | 1604  | 32  | 1422  | 40  | 932   | 20  | 1000  | 52  | 23  | -47 | -22 | -11 | -42 | -38    | P8400  |        |
| 139 | PN130   | c-Myc               | T58/S62   |              | Myc proto-oncogene protein                                                                                            | 3090  | 88  | 3566  | 128 | 2214  | 56  | 1471  | 8   | 4025  | 50  | 1765  | 36  | 1180  | 32  | 2075  | 71  | 15  | -28 | -52 | -56 | -71 | -48    | P01106 |        |
| 140 | NN026   | Cofilin 1           |           | Pan-specific | Cofilin 1                                                                                                             | 42449 | 3   | 28956 | 8   | 19857 | 10  | 41039 | 15  | 39494 | 7   | 38882 | 3   | 49861 | 9   | 28525 | 5   | -32 | -63 | -3  | -2  | 26  | -28    | P23528 |        |
| 141 | PN019   | Cofilin 1           | S3        |              | Cofilin 1                                                                                                             | 15000 | 10  | 20232 | 5   | 11512 | 68  | 24304 | 6   | 26030 | 7   | 30122 | 1   | 13285 | 66  | 16754 | 4   | 35  | -23 | 62  | 16  | -49 | -36    | P23528 |        |
| 142 | PN020   | Cofilin 2           | S3        |              | Cofilin 2                                                                                                             | 3706  | 55  | 4796  | 26  | 3492  | 16  | 4908  | 149 | 6777  | 26  | 6897  | 212 | 2387  | 15  | 2909  | 9   | -29 | -6  | 32  | 2   | -65 | -57    | Q9Y281 |        |
| 143 | PN022-2 | Cortactin           | Y466      |              | Cortactin (amplixin) (mouse)                                                                                          | 41415 | 8   | 12591 | 16  | 17252 | 6   | 12852 | 4   | 37091 | 12  | 11399 | 10  | 47871 | 2   | 12448 | 9   | -70 | -58 | -69 | -69 | 29  | -66    | Q60598 |        |
| 144 | NK042   | COT                 |           | Pan-specific | Osaka thyroid oncogene protein-serine kinase (Tfp2)                                                                   | 1003  | 61  | 1465  | 8   | 1169  | 63  | 1227  | 31  | 1393  | 5   | 1284  | 108 | 1020  | 15  | 1721  | 14  | 46  | 16  | 22  | -8  | -27 | 24     | P41279 |        |
| 145 | NK042-2 | COT                 |           | Pan-specific | Osaka thyroid oncogene protein-serine kinase (Tfp2)                                                                   | 1753  | 48  | 2676  | 55  | 1594  | 33  | 1650  | 34  | 1727  | 17  | 2082  | 4   | 1522  | 1   | 2040  | 5   | 53  | -9  | -6  | 21  | -12 | 18     | P41279 |        |
| 146 | NK027   | COX2                |           | Pan-specific | Cyclo-oxygenase 2 (prostaglandin G/H synthase 2 precursor)                                                            | 40190 | 1   | 31546 | 14  | 21218 | 6   | 43157 | 14  | 39222 | 1   | 39450 | 2   | 54888 | 5   | 30461 | 14  | -21 | -47 | 7   | 1   | 40  | -22    | P33354 |        |
| 147 | NK043   | CRK1B/CaMKKinase VI |           | Pan-specific | Src/tyrosine-protein kinase 6/Calcium kinase 1                                                                        | 3672  | 30  | 37234 | 14  | 22079 | 5   | 42691 | 16  | 37348 | 6   | 42691 | 7   | 49234 | 20  | 2930  | 10  | -25 | 43  | 0   | 32  | -25 | 74     | P41240 |        |
| 148 | PN023   | CREB1               | S129/S133 |              | cAMP response element binding protein 1                                                                               | 36515 | 10  | 21056 | 41  | 18799 | 3   | 33475 | 2   | 34808 | 0   | 21927 | 3   | 46498 | 0   | -42   | -49 | -8  | -16 | 34  | -24 | -24 | P16220 |        |        |
| 149 | PN024   | CREB1               | S133      |              | cAMP response element binding protein 1                                                                               | 5189  | 248 | 4537  | 1   | 3025  | 11  | 9549  | 17  | 8015  | 92  | 24918 | 444 | 3993  | 36  | 7210  | 50  | -13 | -42 | 84  | 211 | -50 | -10    | P16220 |        |
| 150 | PN024-2 | CREB1               | S133      |              | cAMP response element binding protein 1                                                                               | 1033  | 36  | 1480  | 28  | 845   | 23  | 1048  | 30  | 1388  | 69  | 1260  | 14  | 1106  | 6   | 783   | 131 | 43  | -18 | 1   | -9  | -20 | -44    | P16220 |        |
| 151 | NN149   | Crystallin aB       |           | Pan-specific | Crystallin alpha B (heat-shock 20 kDa like-protein)                                                                   | 13315 | 1   | 8842  | 5   | 8399  | 7   | 8997  | 0   | 9367  | 6   | 7121  | 4   | 9952  | 15  | 6613  | 66  | -34 | -37 | -32 | -24 | 6   | -29    | P02511 |        |
| 152 | NN149-2 | Crystallin aB       |           | Pan-specific | Crystallin alpha B (heat-shock 20 kDa like-protein)                                                                   | 3920  | 29  | 5256  | 52  | 3033  | 4   | 3094  | 1   | 8715  | 8   | 3322  | 4   | 4812  | 63  | 2646  | 14  | -34 | -23 | -21 | -62 | -45 | -70    | P02511 |        |
| 153 | NN149-3 | Crystallin aB       |           | Pan-specific | Crystallin alpha B (heat-shock 20 kDa like-protein)                                                                   | 5041  | 39  | 3125  | 26  | 3241  | 11  | 2506  | 5   | 6616  | 6   | 2563  | 24  | 8833  | 32  | 3130  | 13  | -38 | -36 | -50 | -61 | -34 | -53    | P02511 |        |
| 154 | NN149-1 | Crystallin aB       |           | Pan-specific | Crystallin alpha B (heat-shock 20 kDa like-protein)                                                                   | 21496 | 49  | 22174 | 6   | 51597 | 9   | 43373 | 1   | 25714 | 25  | 48161 | 3   | 10959 | 2   | 37078 | 16  | 3   | 140 | 102 | 87  | 57  | 44     | P02511 |        |
| 155 | PN025   | Crystallin aB       | S19       |              | Crystallin alpha B (heat-shock 20 kDa like-protein)                                                                   | 34704 | 14  | 32739 | 3   | 21048 | 55  | 20289 | 8   | 33261 | 4   | 27527 | 12  | 38584 | 0   | 27403 | 7   | -6  | -39 | -42 | -17 | 16  | -18    | P02511 |        |
| 156 | PN110   | Crystallin aB       | S45       |              | Crystallin alpha B (heat-shock 20 kDa like-protein)                                                                   | 31140 | 5   | 28397 | 1   | 16883 | 15  | 16384 | 17  | 25557 | 3   | 27156 | 2   | 35385 | 8   | 17468 | 1   | -10 | -46 | -47 | 6   | 38  | -32    | P02511 |        |
| 157 | NK044   | Csk                 |           | Pan-specific | C-terminus of Src tyrosine kinase                                                                                     | 28479 | 9   | 40544 | 4   | 37490 | 19  | 37034 | 5   | 40651 | 5   | 37034 | 4   | 42385 | 21  | 4     | -30 | -44 | -8  | -33 | 14  | -4  | -22    | P41240 |        |
| 158 | NK044-2 | Csk                 |           | Pan-specific | C-terminus of Src tyrosine kinase                                                                                     | 13308 | 12  | 8484  | 9   | 11892 | 9   | 6181  | 21  | 18955 | 19  | 8068  | 41  | 8109  | 22  | 5690  | 75  | -36 | -12 | -54 | -68 | -57 | -70    | P41240 |        |
| 159 | NN028   | Cyclin A            |           | Pan-specific | Cyclin A1                                                                                                             | 19295 | 19  | 27047 | 7   | 37623 | 2   | 28594 | 8   | 15453 | 13  | 22713 | 2   | 10246 | 5   | 25553 | 8   | 40  | 95  | 48  | 47  | -34 | 65     | P78396 |        |
| 160 | NN029   | Cyclin B1           |           | Pan-specific | Cyclin B1                                                                                                             | 10597 | 40  | 6448  | 34  | 9581  | 17  | 5610  | 15  | 11147 | 21  | 3190  | 11  | 5480  | 2   | 2377  | 27  | -39 | -10 | -47 | -71 | -51 | -79    | P14635 |        |
| 161 | NN030-1 | Cyclin D1           |           | Pan-specific | Cyclin D1 (PRAD1)                                                                                                     | 18985 | 22  | 8498  | 9   | 10646 | 3   | 8365  | 7   | 11308 | 2   | 8119  | 2   | 8988  | 4   | 6864  | 6   | -55 | -44 | -56 | -28 | -21 | -39    | P24385 |        |
| 162 | NN030-2 | Cyclin D1           |           | Pan-specific | Cyclin D1 (PRAD1)                                                                                                     | 915   | 16  | 1595  | 20  | 1412  | 15  | 940   | 38  | 1316  | 94  | 1160  | 29  | 1112  | 30  | 1059  | 108 | 74  | 54  | 3   | -12 | -16 | -20    | P24385 |        |
| 163 | NN031   | Cyclin E            |           | Pan-specific | Cyclin E1                                                                                                             | 9749  | 23  | 6157  | 35  | 9794  | 12  | 5399  | 26  | 9405  | 4   | 6836  | 5   | 6500  | 15  | 4194  | 45  | -37 | 0   | -45 | -27 | -31 | -55    | P24864 |        |
| 164 | NN032   | Cyclin G1           |           | Pan-specific | Cyclin G1                                                                                                             | 8402  | 3   | 7979  | 89  | 10130 | 14  | 6286  | 11  | 7894  | 2   | 5888  | 25  | 6849  | 6   | 4406  | 2   | -5  | 21  | -25 | -25 | -16 | -44    | P51959 |        |
| 165 | NN033   | CytoC               |           | Pan-specific | Cytochrome C                                                                                                          | 8358  | 11  | 4529  | 49  | 7760  | 17  | 3329  | 92  | 6620  | 9   | 3169  | 21  | 6448  | 0   | 2885  | 3   | -46 | -6  | -7  | -60 | -52 | -3     | -56    | P99999 |
| 166 | PN026   | Dab1                | Y198      |              | Disabled homolog 1                                                                                                    | 37404 | 9   | 18371 | 25  | 36777 | 1   | 27857 | 21  | 31788 | 10  | 29723 | 10  | 43472 | 11  | 14711 | 16  | -51 | -2  | -26 | -4  | 37  | -54    | O75553 |        |
| 167 | NK210   | DAPK1               |           | Pan-specific | Death-associated protein kinase 1                                                                                     | 1018  | 20  | 1665  | 43  | 1430  | 37  | 1470  | 49  | 1569  | 36  | 1356  | 31  | 1150  | 34  | 1138  | 49  | 66  | 40  | -41 | -14 | -27 | -27    | P43355 |        |
| 168 | NK046   | DAPK2               |           | Pan-specific | Death-associated protein kinase 2                                                                                     | 2714  | 31  | 18440 | 4   | 28673 | 9   | 27403 | 27  | 4433  | 58  | 1111  | 11  | 4258  | 29  | 4714  | 57  | 27  | -10 | -16 | -33 | -43 | -24    | P41240 |        |
| 169 | NN034   | DAXX                |           | Pan-specific | Death-associated protein 6 (BIN2C)                                                                                    | 20714 |     |       |     |       |     |       |     |       |     |       |     |       |     |       |     |     |     |     |     |     |        |        |        |

|     |               |               |  |                    |                                                                    |       |     |       |     |       |     |       |     |       |     |       |     |       |     |       |     |     |     |      |     |     |        |               |        |
|-----|---------------|---------------|--|--------------------|--------------------------------------------------------------------|-------|-----|-------|-----|-------|-----|-------|-----|-------|-----|-------|-----|-------|-----|-------|-----|-----|-----|------|-----|-----|--------|---------------|--------|
| 248 | NK069-NK070   | GSK3ab        |  | Pan-specific       | Glycogen synthase-serine kinase 3 alpha/beta                       | 16945 | 88  | 1711  | 20  | 6117  | 54  | 836   | 9   | 4778  | 5   | 1869  | 1   | 11844 | 776 | 1768  | 2   | -90 | -64 | -95  | -61 | 148 | -63    | P49840_P49841 |        |
| 249 | NK069-NK070-2 | GSK3ab        |  | Pan-specific       | Glycogen synthase-serine kinase 3 alpha/beta                       | 4522  | 31  | 3104  | 3   | 3239  | 9   | 2394  | 21  | 7147  | 31  | 3001  | 15  | 3109  | 8   | 3757  | 1   | -31 | -28 | -47  | -58 | -57 | -47    | P49840_P49841 |        |
| 250 | PK026-PK027-1 | GSK3ab        |  | Pan-specific       | Glycogen synthase-serine kinase 3 alpha/beta                       | 1526  | 24  | 2075  | 28  | 1086  | 4   | 909   | 34  | 1527  | 100 | 1225  | 21  | 879   | 14  | 1631  | 26  | 36  | -29 | -40  | -20 | -42 | 7      | P49840_P49841 |        |
| 251 | PK026-PK029-1 | GSK3ab        |  | Pan-specific       | Glycogen synthase-serine kinase 3 alpha/beta                       | 1833  | 45  | 2952  | 27  | 18656 | 8   | 29159 | 4   | 11433 | 28  | 11625 | 28  | 5171  | 26  | 7917  | 222 | 61  | 918 | 1491 | 2   | -55 | -31    | P49840_P49841 |        |
| 252 | NK194-NK195-1 | GSK3ab        |  | Pan-specific       | Glycogen synthase-serine kinase 3 alpha/beta                       | 19526 | 15  | 27078 | 5   | 60281 | 1   | 37121 | 6   | 34012 | 6   | 52015 | 4   | 16730 | 11  | 29398 | 4   | 39  | 209 | 90   | 53  | -54 | -14    | P49840_P49841 |        |
| 253 | NK194-NK195-3 | GSK3ab        |  | Pan-specific       | Glycogen synthase-serine kinase 3 alpha/beta                       | 1847  | 96  | 1464  | 13  | 1617  | 22  | 822   | 32  | 2690  | 18  | 1484  | 39  | 1648  | 20  | 1411  | 111 | -21 | -12 | -56  | -45 | -39 | -48    | P49840_P49841 |        |
| 254 | NK194-NK195-4 | GSK3ab        |  | Pan-specific       | Glycogen synthase-serine kinase 3 alpha/beta                       | 2132  | 17  | 2808  | 10  | 2178  | 1   | 1701  | 14  | 5644  | 51  | 2136  | 21  | 1665  | 30  | 1875  | 48  | -32 | 2   | -20  | -62 | -70 | -67    | P49840_P49841 |        |
| 255 | NK071         | Hspin         |  | Pan-specific       | Hsp70 germ cell-specific nuclear protein-serine kinase             | 2093  | 33  | 2627  | 4   | 2344  | 1   | 1895  | 39  | 2776  | 6   | 1602  | 54  | 2443  | 28  | 2377  | 5   | 26  | 12  | -19  | -42 | -12 | -14    | Q81776        |        |
| 256 | NK081-1       | Hsp23B        |  | Pan-specific       | UV1 excision repair protein RAD23 homolog B                        | 42440 | 5   | 42440 | 2   | 41730 | 1   | 46943 | 10  | 43694 | 10  | 43694 | 10  | 43694 | 10  | 43694 | 3   | 3   | 4   | 10   | 15  | 27  | 31     | P07472        |        |
| 257 | NN051         | Hsp           |  | Pan-specific       | Hsp70/Hsc70 interacting protein (ST13)                             | 17593 | 5   | 21579 | 6   | 31098 | 14  | 19137 | 2   | 22225 | 15  | 17337 | 1   | 11305 | 7   | 17157 | 0   | 23  | 77  | 9    | 9   | -49 | -23    | P05052        |        |
| 258 | PN035         | Histone H1    |  | phospho CDK1 sites | Histone H1 phosphorylated                                          | 2680  | 50  | 4074  | 16  | 4817  | 54  | 4675  | 18  | 2898  | 7   | 2623  | 15  | 2245  | 37  | 3281  | 30  | 52  | 80  | 74   | -9  | -23 | Q02538 |               |        |
| 259 | PN036         | Histone H2A_X |  | S139               | Histone H2A variant X                                              | 2967  | 8   | 4311  | 66  | 3172  | 41  | 2325  | 17  | 4323  | 23  | 2412  | 37  | 2808  | 17  | 2785  | 3   | 45  | 7   | -22  | -44 | -35 | -36    | P16104        |        |
| 260 | PN037         | Histone H2B   |  | S14                | Histone H2B                                                        | 12591 | 5   | 15149 | 14  | 42203 | 3   | 19672 | 7   | 17352 | 12  | 26057 | 30  | 10672 | 3   | 15255 | 7   | 20  | 235 | 9    | 50  | -38 | -12    | P33778        |        |
| 261 | PN038         | Histone H3    |  | S10                | Histone H3.3                                                       | 1813  | 29  | 2452  | 3   | 2832  | 24  | 1982  | 0   | 2949  | 8   | 2317  | 5   | 1308  | 36  | 1728  | 2   | 35  | 56  | 9    | -21 | -66 | -41    | P84243        |        |
| 262 | PN039         | Histone H3    |  | S28                | Histone H3.3                                                       | 22170 | 7   | 15266 | 8   | 11253 | 4   | 17701 | 72  | 16475 | 41  | 24869 | 2   | 12037 | 44  | 15990 | 45  | -31 | -49 | -20  | 51  | -27 | -3     | P84243        |        |
| 263 | PN100         | Histone H3    |  | T11                | Histone H3.3                                                       | 4985  | 25  | 6144  | 77  | 7057  | 28  | 3141  | 9   | 10853 | 6   | 3504  | 2   | 7981  | 22  | 6878  | 31  | 23  | 42  | -37  | -68 | -26 | -37    | P84243        |        |
| 264 | PN101         | Histone H3    |  | T3                 | Histone H3.3                                                       | 12616 | 7   | 32527 | 6   | 25730 | 69  | 15753 | 47  | 17135 | 11  | 13208 | 20  | 7883  | 14  | 26764 | 12  | 158 | 104 | 25   | -23 | -54 | 56     | P84243        |        |
| 265 | PN101-2       | Histone H3    |  | T3                 | Histone H3.3                                                       | 10951 | 24  | 13085 | 18  | 12178 | 49  | 8937  | 49  | 15995 | 9   | 3379  | 30  | 13092 | 39  | 13661 | 31  | 19  | 11  | -18  | -79 | -18 | -15    | P84243        |        |
| 266 | NN052         | H01           |  | Pan-specific       | Heme oxygenase 1                                                   | 19670 | 27  | 16536 | 16  | 34907 | 4   | 16771 | 0   | 23286 | 18  | 20178 | 11  | 12219 | 16  | 15900 | 7   | -15 | 77  | -15  | -13 | -48 | -18    | P09601        |        |
| 267 | NN052-2       | H01           |  | Pan-specific       | Heme oxygenase 1                                                   | 18716 | 15  | 13464 | 21  | 16338 | 17  | 10985 | 17  | 6896  | 3   | 3010  | 16  | 4978  | 31  | 14881 | 3   | -28 | -10 | -41  | 31  | 30  | 116    | P09601        |        |
| 268 | NN053         | H02           |  | Pan-specific       | Heme oxygenase 2                                                   | 16663 | 9   | 22450 | 37  | 25232 | 15  | 17683 | 2   | 20132 | 1   | 19116 | 85  | 11256 | 1   | 19180 | 8   | 35  | 51  | 6    | -5  | -44 | -25    | P30519        |        |
| 269 | NK072         | Hpk1          |  | Pan-specific       | Hematopoietic progenitor protein-serine kinase 1                   | 12161 | 28  | 14174 | 15  | 9444  | 46  | 7279  | 1   | 9297  | 1   | 6240  | 5   | 8157  | 14  | 9256  | 1   | 17  | -22 | -40  | -33 | -12 | 0      | Q82918        |        |
| 270 | NN054         | Hsc70         |  | Pan-specific       | Heat shock 70 kDa protein 8                                        | 12114 | 15  | 8843  | 17  | 6145  | 34  | 4877  | 73  | 12721 | 27  | 5156  | 48  | 6876  | 25  | 9671  | 7   | -27 | -49 | -60  | -59 | -46 | -24    | P11142        |        |
| 271 | NN054-2       | Hsc70         |  | Pan-specific       | Heat shock 70 kDa protein 8                                        | 19838 | 10  | 18953 | 2   | 56425 | 0   | 40769 | 1   | 22922 | 3   | 48261 | 5   | 10454 | 23  | 17413 | 23  | -4  | 184 | 106  | 102 | -54 | -24    | P11142        |        |
| 272 | NN054-3       | Hsc70         |  | Pan-specific       | Heat shock 70 kDa protein 8                                        | 15706 | 1   | 10681 | 27  | 10991 | 61  | 9934  | 32  | 9223  | 14  | 6336  | 51  | 9035  | 15  | 12252 | 30  | -37 | -30 | -37  | -31 | 5   | 33     | P11142        |        |
| 273 | NN055         | HSF4          |  | Pan-specific       | Heat shock transcription factor 4                                  | 38798 | 8   | 29880 | 67  | 48460 | 67  | 48654 | 0   | 30889 | 13  | 43217 | 1   | 44971 | 17  | 44374 | 23  | -23 | 25  | 25   | 40  | 46  | 44     | Q9ULV5        |        |
| 274 | NN062         | Hsp105        |  | Pan-specific       | Heat shock 105 kDa protein                                         | 9746  | 22  | 13526 | 18  | 7936  | 2   | 5279  | 40  | 10344 | 47  | 4685  | 24  | 6029  | 17  | 6358  | 8   | -39 | -19 | -46  | -55 | -42 | -39    | Q92598        |        |
| 275 | NN152-1       | Hsp27         |  | Pan-specific       | Heat shock 27 kDa protein beta 1 (HspB1)                           | 20442 | 23  | 19339 | 12  | 25455 | 3   | 17512 | 3   | 20242 | 12  | 19203 | 3   | 10006 | 19  | 16495 | 12  | -5  | 25  | -14  | -5  | -51 | -19    | P04792        |        |
| 276 | NN152         | Hsp27         |  | Pan-specific       | Heat shock 27 kDa protein beta 1 (HspB1)                           | 12017 | 79  | 13232 | 31  | 8956  | 2   | 10852 | 35  | 10487 | 3   | 6787  | 39  | 7884  | 43  | 11239 | 64  | 10  | -25 | -10  | -35 | -28 | 7      | P04792        |        |
| 277 | PN061-1       | Hsp27         |  | Pan-specific       | Heat shock 27 kDa protein beta 1 (HspB1)                           | 552   | 71  | 1750  | 44  | 1940  | 0   | 1498  | 23  | 1819  | 5   | 2172  | 32  | 2013  | 28  | 217   | 252 | 209 | 15  | 19   | 11  | 11  | 11     | P04792        |        |
| 278 | PN040-2       | Hsp27         |  | Pan-specific       | Heat shock 27 kDa protein beta 1 (HspB1)                           | 5134  | 24  | 5134  | 54  | 2334  | 10  | 2827  | 42  | 2879  | 30  | 3375  | 3   | 2347  | 7   | 3688  | 8   | 121 | 22  | 19   | 28  | 28  | 28     | P07900        |        |
| 279 | PN041         | Hsp27         |  | Pan-specific       | Heat shock 27 kDa protein beta 1 (HspB1)                           | 15828 | 2   | 20570 | 20  | 41756 | 20  | 33103 | 40  | 18344 | 33  | 25554 | 115 | 13202 | 12  | 21264 | 56  | 58  | 164 | 109  | 39  | -28 | 16     | P04792        |        |
| 280 | PN042-1       | Hsp27         |  | Pan-specific       | Heat shock 27 kDa protein beta 1 (HspB1)                           | 30639 | 7   | 35262 | 29  | 37513 | 11  | 42295 | 5   | 24009 | 17  | 38525 | 6   | 35470 | 10  | 45684 | 12  | 15  | 22  | 38   | 52  | 48  | 90     | P04792        |        |
| 281 | PN042-2       | Hsp27         |  | Pan-specific       | Heat shock 27 kDa protein beta 1 (HspB1)                           | 1327  | 32  | 1348  | 13  | 1361  | 2   | 822   | 7   | 1573  | 51  | 1686  | 19  | 1138  | 7   | 1597  | 81  | 2   | 3   | -38  | 7   | -28 | 2      | P04792        |        |
| 282 | PN043         | Hsp27         |  | Pan-specific       | Heat shock 27 kDa protein beta 1 (HspB1)                           | 11124 | 92  | 21338 | 3   | 14252 | 42  | 33497 | 3   | 14613 | 37  | 26033 | 26  | 20587 | 31  | 25981 | 7   | 92  | 28  | 201  | 78  | 41  | 78     | P14602        |        |
| 283 | NN057         | Hsp40         |  | Pan-specific       | DnaJ homolog, subfamily B member 1                                 | 886   | 55  | 1673  | 56  | 1613  | 6   | 1774  | 112 | 1485  | 29  | 2188  | 59  | 793   | 71  | 2417  | 2   | 89  | 82  | 100  | 47  | -47 | 63     | P25685        |        |
| 284 | NN057-2       | Hsp40         |  | Pan-specific       | DnaJ homolog, subfamily B member 1                                 | 13257 | 4   | 21799 | 114 | 34219 | 230 | 18586 | 28  | 18913 | 19  | 11905 | 5   | 8655  | 12  | 16690 | 38  | 64  | 158 | 40   | -37 | -54 | -12    | P25685        |        |
| 285 | NN057-3       | Hsp40         |  | Pan-specific       | DnaJ homolog, subfamily B member 1                                 | 15516 | 2   | 19449 | 5   | 56611 | 0   | 35462 | 19  | 20285 | 8   | 40783 | 18  | 9121  | 12  | 14946 | 43  | 25  | 265 | 129  | 101 | -55 | -26    | P25685        |        |
| 286 | NN058         | Hsp47         |  | Pan-specific       | Heat shock 47 kDa protein (collagen-binding protein 1, colligin 1) | 4705  | 6   | 5027  | 29  | 6270  | 3   | 2704  | 3   | 5344  | 41  | 4740  | 30  | 7468  | 54  | 4219  | 31  | 7   | 33  | -43  | -11 | 40  | -21    | P29043        |        |
| 287 | NN059-1       | Hsp60         |  | Pan-specific       | Heat shock 60 kDa protein 1 (chaperonin, CPN60)                    | 7335  | 26  | 3212  | 31  | 5222  | 72  | 4160  | 90  | 7880  | 36  | 7428  | 44  | 4799  | 40  | 5690  | 50  | -56 | -29 | -43  | -6  | -39 | -28    | P10809        |        |
| 288 | NN059-2       | Hsp60         |  | Pan-specific       | Heat shock 60 kDa protein 1 (chaperonin, CPN60)                    | 36245 | 9   | 36245 | 0   | 35267 | 1   | 47675 | 12  | 36467 | 10  | 37365 | 3   | 37365 | 3   | 37365 | 3   | 3   | 3   | 25   | 43  | 25  | 4      | P10809        |        |
| 289 | NN059-3       | Hsp60         |  | Pan-specific       | Heat shock 60 kDa protein 1 (chaperonin, CPN60)                    | 7118  | 5   | 8336  | 0   | 11098 | 2   | 6475  | 20  | 9368  | 3   | 6376  | 26  | 8451  | 11  | 8903  | 16  | -17 | 66  | -9   | -32 | 1   | -6     | P10809        |        |
| 290 | NN060         | Hsp70         |  | Pan-specific       | Heat shock 70 kDa protein 1                                        | 1027  | 32  | 4484  | 12  | 1480  | 40  | 1219  | 71  | 1839  | 29  | 1473  | 29  | 1578  | 52  | 2025  | 41  | 138 | 42  | 19   | -20 | -14 | 10     | P08107        |        |
| 291 | NN060-2       | Hsp70         |  | Pan-specific       | Heat shock 70 kDa protein 1                                        | 7234  | 33  | 2869  | 4   | 4229  | 20  | 2107  | 8   | 8344  | 43  | 3267  | 48  | 3678  | 377 | 2192  | 24  | -60 | -42 | -71  | -61 | -56 | -74    | P08107        |        |
| 292 | NN060-3       | Hsp70         |  | Pan-specific       | Heat shock 70 kDa protein 1                                        | 22605 | 10  | 18232 | 4   | 56909 | 2   | 32408 | 1   | 22406 | 22  | 26742 | 14  | 11173 | 11  | 15641 | 11  | -19 | 152 | 149  | 19  | -50 | -30    | P08107        |        |
| 293 | NN061         | Hsp90         |  | Pan-specific       | Heat shock 90 kDa protein alpha/beta                               | 11910 | 10  | 10447 | 6   | 21855 | 25  | 7915  | 43  | 21632 | 16  | 9649  | 10  | 9758  | 1   | 6181  | 2   | -12 | 84  | -34  | -54 | -55 | -71    | P07900        |        |
| 294 | NN061-10      | Hsp90         |  | Pan-specific       | Heat shock 90 kDa protein alpha/beta                               | 10316 | 8   | 14137 | 377 | 18153 | 66  | 12751 | 52  | 28038 | 44  | 8626  | 144 | 8243  | 12  | 6604  | 2   | 37  | 76  | 24   | -64 | -69 | -71    | -76           | P07900 |
| 295 | NN061-2       | Hsp90         |  | Pan-specific       | Heat shock 90 kDa protein alpha/beta                               | 8671  | 163 | 4597  | 22  | 6605  | 19  | 4667  | 19  | 12122 | 19  | 3103  | 22  | 9580  | 74  | 3982  | 10  | -47 | -24 | -46  | -74 | -21 | -67    | P07900        |        |
| 296 | NN061-3       | Hsp90         |  | Pan-specific       | Heat shock 90 kDa protein alpha/beta                               | 2305  | 42  | 3927  | 46  | 4422  | 56  | 2866  | 5   | 2826  | 16  | 2440  | 28  | 4057  | 51  | 5292  | 33  | 70  | 92  | 24   | -14 | 44  | 87     | P07900        |        |
| 297 | NN061-4       | Hsp90         |  | Pan-specific       | Heat shock 90 kDa protein alpha/beta                               | 2211  | 8   | 6997  | 2   | 2827  | 62  | 4280  | 51  | 3310  | 26  | 17285 | 85  | 2592  | 72  | 5638  | 37  | 218 | 218 | 94   | -42 | -22 | 70     | P07900        |        |
| 298 | NN061-5       | Hsp90         |  | Pan-specific       | Heat shock 90 kDa protein alpha/beta                               | 8556  | 3   | 10939 | 13  | 17629 | 49  | 17415 | 16  | 8673  | 103 | 7907  | 264 | 4947  | 65  | 8447  | 47  | 28  | 106 | 104  | -22 | -43 | -3     | P07900        |        |
| 299 | NN061-6       | Hsp90         |  | Pan-specific       |                                                                    |       |     |       |     |       |     |       |     |       |     |       |     |       |     |       |     |     |     |      |     |     |        |               |        |

|     |               |                   |                      |              |                                                                                                    |       |     |       |     |       |     |       |      |       |     |       |     |       |     |       |     |      |     |     |     |     |        |        |        |
|-----|---------------|-------------------|----------------------|--------------|----------------------------------------------------------------------------------------------------|-------|-----|-------|-----|-------|-----|-------|------|-------|-----|-------|-----|-------|-----|-------|-----|------|-----|-----|-----|-----|--------|--------|--------|
| 379 | NK090         | Ksr1              |                      | Pan-specific | Protein-serine kinase suppressor of Ras 1                                                          | 939   | 30  | 1374  | 27  | 738   | 70  | 520   | 8    | 1155  | 14  | 1135  | 10  | 446   | 73  | 863   | 39  | 46   | -21 | -45 | -2  | -61 | -25    | Q81V15 |        |
| 380 | NK090-2       | Ksr-1             |                      | Pan-specific | Protein-serine kinase suppressor of Ras 1                                                          | 9316  | 15  | 7104  | 19  | 5124  | 11  | 5671  | 16   | 9849  | 61  | 5745  | 27  | 4413  | 32  | 4979  | 21  | -24  | -45 | -39 | -42 | -55 | -49    | Q81V15 |        |
| 381 | NP005         | LAR               |                      | Pan-specific | LCA antigen-related (LAR) receptor tyrosine phosphatase                                            | 37608 | 5   | 20094 | 8   | 48933 | 4   | 41470 | 21   | 30930 | 0   | 39555 | 8   | 50793 | 1   | 45437 | 19  | -47  | 30  | 10  | 28  | 64  | 47     | P10586 |        |
| 382 | NK091         | LATS1             |                      | Pan-specific | Large tumor suppressor 1 protein-serine kinase (WARTS)                                             | 4027  | 43  | 3859  | 20  | 4779  | 15  | 3205  | 19   | 4860  | 124 | 6706  | 47  | 4145  | 40  | 3207  | 40  | -4   | 19  | -20 | 32  | -15 | -34    | O95835 |        |
| 383 | NK092-2       | Lck               |                      | Pan-specific | Lymphocyte-specific protein-tyrosine kinase                                                        | 10168 | 33  | 10620 | 25  | 7521  | 3   | 6886  | 4    | 7902  | 30  | 4940  | 81  | 7220  | 29  | 2919  | 30  | 4    | -26 | -40 | -37 | -9  | -63    | P06239 |        |
| 384 | NK092-3       | Lck               |                      | Pan-specific | Lymphocyte-specific protein-tyrosine kinase                                                        | 38218 | 5   | 35991 | 2   | 35510 | 4   | 35097 | 9    | 32071 | 8   | 41469 | 1   | 49779 | 3   | 43679 | 7   | -6   | -7  | -8  | 29  | 55  | 36     | P06239 |        |
| 385 | PK039         | Lck               |                      | Pan-specific | Lymphocyte-specific protein-tyrosine kinase                                                        | 21661 | 7   | 12958 | 5   | 15888 | 15  | 18841 | 22   | 19135 | 2   | 15205 | 11  | 23389 | 3   | 15825 | 11  | -40  | -27 | -13 | -21 | 22  | -17    | P06239 |        |
| 386 | PK040         | Lck               |                      | Pan-specific | Lymphocyte-specific protein-tyrosine kinase                                                        | 38478 | 4   | 16219 | 13  | 14916 | 8   | 11171 | 24   | 21627 | 18  | 14221 | 10  | 38303 | 1   | 17058 | 10  | -58  | -61 | -71 | -34 | 67  | -21    | P06239 |        |
| 387 | PK041         | Lck               |                      | Pan-specific | Lymphocyte-specific protein-tyrosine kinase                                                        | 30679 | 1   | 30679 | 1   | 30679 | 8   | 33463 | 2    | 30491 | 5   | 34433 | 6   | 40330 | 6   | 40330 | 5   | 0    | -7  | 4   | 53  | 46  | 76     | 76     | P06239 |
| 388 | NK093         | LMNK1             |                      | Pan-specific | LIM domain kinase 1                                                                                | 43500 | 3   | 44053 | 2   | 44053 | 13  | 52341 | 11   | 45032 | 6   | 26536 | 2   | 49244 | 38  | 5167  | 3   | -1   | 2   | -3  | -1  | 1   | -4     | P53667 |        |
| 389 | PK042-PK118   | LMNK1/2           | Y507+T508, Y504+T505 |              | LIM domain kinase 1/2                                                                              | 37012 | 1   | 29852 | 14  | 30496 | 1   | 31236 | 11   | 32319 | 11  | 48313 | 10  | 43807 | 4   | 28712 | 34  | -19  | -18 | -18 | -16 | 49  | 36     | -11    | P53667 |
| 390 | NK094         | LOK               |                      | Pan-specific | Lymphocyte-oriented protein-serine kinase                                                          | 11203 | 66  | 10265 | 10  | 10265 | 1   | 17890 | 103  | 14824 | 46  | 7880  | 28  | 9388  | 35  | 9596  | 185 | -8   | -60 | -47 | -37 | -35 | O94804 |        |        |
| 391 | NK095         | Lyn               |                      | Pan-specific | Yes-related protein-tyrosine kinase                                                                | 8070  | 52  | 8610  | 18  | 7477  | 23  | 6213  | 6    | 12006 | 26  | 7217  | 2   | 6258  | 0   | 6668  | 31  | 7    | -7  | -23 | -40 | -48 | -44    | P07948 |        |
| 392 | PK043         | Lyn               |                      | Pan-specific | Yes-related protein-tyrosine kinase                                                                | 672   | 7   | 1609  | 7   | 1021  | 5   | 271   | 1472 | 1064  | 39  | 1098  | 2   | 976   | 13  | 1752  | 40  | 139  | 52  | -60 | 3   | -8  | 65     | P07948 |        |
| 393 | NK096         | MAK               |                      | Pan-specific | Male germ cell-associated protein-serine kinase                                                    | 3334  | 15  | 6280  | 43  | 3674  | 7   | 3557  | 36   | 3255  | 0   | 2663  | 47  | 2320  | 6   | 3009  | 16  | 88   | 10  | 7   | -18 | -29 | -8     | P20794 |        |
| 394 | NK097         | MAPKAPK2          |                      | Pan-specific | Mitogen-activated protein kinase-activated protein kinase 2                                        | 12164 | 6   | 10913 | 31  | 8831  | 19  | 7873  | 8    | 13171 | 14  | 11517 | 24  | 7107  | 2   | 5631  | 31  | -10  | -27 | -35 | -13 | -46 | -57    | P49137 |        |
| 395 | PK044         | MAPKAPK2          | T222                 |              | Mitogen-activated protein kinase-activated protein kinase 2                                        | 4420  | 38  | 4196  | 17  | 5793  | 45  | 4915  | 23   | 8014  | 35  | 4468  | 32  | 2904  | 107 | 4516  | 43  | -5   | 31  | 11  | -44 | -64 | -44    | P49137 |        |
| 396 | PN049-FN112-1 | MAPKAPK2ab        | T334                 |              | Mitogen-activated protein kinase-activated protein kinase 2 alpha/beta                             | 4318  | 45  | 4411  | 46  | 2852  | 23  | 3408  | 16   | 4510  | 31  | 2770  | 14  | 2505  | 11  | 2954  | 8   | 2    | -34 | -21 | -39 | -44 | -35    | P49137 |        |
| 397 | PN049-FN112-2 | MAPKAPK2ab        | T334                 |              | Mitogen-activated protein kinase-activated protein kinase 2 alpha/beta                             | 36530 | 3   | 31851 | 15  | 40115 | 21  | 40484 | 7    | 28355 | 11  | 42081 | 6   | 45172 | 2   | 47066 | 1   | -13  | 10  | 11  | 48  | 59  | 66     | P49137 |        |
| 398 | PN050-1       | MARCKS            | S159+S162            |              | Myristoylated alanine-rich protein kinase C substrate                                              | 4961  | 116 | 34824 | 186 | 12211 | 86  | 29739 | 9    | 5198  | 38  | 9398  | 13  | 5511  | 4   | 6542  | 44  | 31   | 146 | 489 | 75  | 6   | 28     | P29596 |        |
| 399 | NK098         | MARCKS            |                      | Pan-specific | Myristoylated alanine-rich protein kinase C substrate                                              | 1730  | 53  | 4527  | 34  | 1966  | 129 | 1157  | 0    | 1741  | 18  | 3896  | 47  | 981   | 3   | 4096  | 77  | 162  | 14  | -33 | 124 | -44 | 135    | Q8P0L2 |        |
| 400 | NK067         | Me1               |                      | Pan-specific | Myeloid cell leukemia differentiation protein 1                                                    | 7748  | 8   | 8077  | 9   | 6939  | 11  | 5624  | 9    | 6334  | 17  | 6700  | 16  | 5547  | 10  | 5748  | 4   | 4    | -10 | -27 | 6   | -12 | -9     | Q07820 |        |
| 401 | KN155         | MEF-2             |                      | Pan-specific | Myelin expression factor 2 (MYEF2)                                                                 | 2675  | 42  | 5661  | 8   | 6758  | 29  | 5562  | 7    | 2436  | 47  | 2701  | 6   | 3172  | 7   | 6019  | 10  | 112  | 153 | 108 | 11  | 30  | 147    | O9P2K5 |        |
| 402 | NK099-1       | MEK1 (MAP2K1)     |                      | Pan-specific | MAPK/ERK protein-serine kinase 1 (MKK1)                                                            | 42281 | 4   | 30672 | 17  | 39616 | 4   | 43231 | 12   | 31779 | 7   | 48363 | 2   | 52311 | 1   | 42940 | 14  | -27  | -6  | 2   | 46  | 65  | 35     | Q02750 |        |
| 403 | NK099-2       | MEK1 (MAP2K1)     |                      | Pan-specific | MAPK/ERK protein-serine kinase 1 (MKK1)                                                            | 1420  | 4   | 2000  | 2   | 1504  | 16  | 1030  | 46   | 1473  | 5   | 1666  | 114 | 1260  | 5   | 1068  | 14  | 41   | 6   | -28 | 13  | -14 | -28    | Q02750 |        |
| 404 | NK099-3       | MEK1 (MAP2K1)     |                      | Pan-specific | MAPK/ERK protein-serine kinase 1 (MKK1)                                                            | 1245  | 58  | 1652  | 16  | 1429  | 17  | 1450  | 15   | 1731  | 37  | 1325  | 17  | 1144  | 20  | 4709  | 0   | 33   | 15  | 16  | -23 | -34 | 172    | Q02750 |        |
| 405 | NK099-4       | MEK1 (MAP2K1)     |                      | Pan-specific | MAPK/ERK protein-serine kinase 1 (MKK1)                                                            | 3196  | 36  | 5379  | 10  | 3454  | 12  | 5201  | 147  | 2726  | 19  | 4901  | 12  | 3377  | 42  | 6890  | 17  | 68   | 8   | 63  | 80  | 24  | 153    | Q02750 |        |
| 406 | NK099-5       | MEK1 (MAP2K1)     |                      | Pan-specific | MAPK/ERK protein-serine kinase 1 (MKK1)                                                            | 1364  | 39  | 2042  | 17  | 1561  | 43  | 1231  | 106  | 3301  | 28  | 1837  | 28  | 1316  | 4   | 1396  | 56  | 50   | 14  | -10 | 41  | 1   | 7      | Q02750 |        |
| 407 | PK046-1       | MEK1 (MAP2K1)     | T291                 |              | MAPK/ERK protein-serine kinase 1 (MKK1)                                                            | 27874 | 1   | 16183 | 2   | 12578 | 4   | 10982 | 27   | 18352 | 0   | 17619 | 3   | 36497 | 12  | 15261 | 4   | -42  | -55 | -62 | -4  | 99  | -7     | Q02750 |        |
| 408 | PK046-2       | MEK1 (MAP2K1)     | T291                 |              | MAPK/ERK protein-serine kinase 1 (MKK1)                                                            | 41591 | 7   | 31354 | 23  | 15507 | 10  | 13102 | 4    | 34555 | 19  | 36503 | 5   | 46576 | 23  | 37051 | 20  | 0    | -25 | -63 | -88 | 6   | 35     | 7      | Q02750 |
| 409 | PK046-3       | MEK1 (MAP2K1)     | T291                 |              | MAPK/ERK protein-serine kinase 1 (MKK1)                                                            | 549   | 60  | 1462  | 69  | 744   | 81  | 4389  | 83   | 1150  | 60  | 549   | 36  | 2538  | 100 | 166   | 34  | -152 | 84  | -16 | -46 | 121 | Q02750 |        |        |
| 410 | PK047-2       | MEK1 (MAP2K1)     | S297                 |              | MAPK/ERK protein-serine kinase 1 (MKK1)                                                            | 46480 | 3   | 31883 | 1   | 14934 | 1   | 13713 | 4    | 42381 | 5   | 56514 | 3   | 49099 | 0   | 30372 | 36  | -31  | -28 | -70 | -16 | 16  | -28    | Q02750 |        |
| 411 | PK048-1       | MEK1 (MAP2K1)     | T385                 |              | MAPK/ERK protein-serine kinase 1 (MKK1)                                                            | 16934 | 17  | 19556 | 35  | 20526 | 45  | 33142 | 26   | 14258 | 18  | 27573 | 11  | 33078 | 19  | 26350 | 83  | 15   | 21  | 96  | 93  | 132 | 85     | Q02750 |        |
| 412 | PK048-2       | MEK1 (MAP2K1)     | T385                 |              | MAPK/ERK protein-serine kinase 1 (MKK1)                                                            | 43335 | 1   | 19063 | 14  | 13502 | 4   | 11276 | 17   | 29746 | 7   | 24207 | 33  | 46084 | 12  | 17800 | 20  | -56  | -69 | -74 | -19 | 55  | -40    | Q02750 |        |
| 413 | PK048-3       | MEK1 (MAP2K1)     | T385                 |              | MAPK/ERK protein-serine kinase 1 (MKK1)                                                            | 869   | 636 | 1333  | 16  | 615   | 46  | 792   | 67   | 1516  | 134 | 1211  | 56  | 490   | 26  | 683   | 19  | 53   | -29 | -9  | -20 | -68 | -55    | Q02750 |        |
| 414 | NK099-6       | MEK1/2            |                      | Pan-specific | MAPK/ERK protein-serine kinase 1/2 (MKK1/2)                                                        | 2038  | 7   | 2188  | 46  | 1501  | 55  | 1423  | 90   | 4550  | 65  | 1864  | 29  | 1549  | 47  | 711   | 207 | 7    | -26 | -30 | -59 | -66 | -84    | Q02750 |        |
| 415 | PK049-PN007   | MEK1/2+B23 (NPM)  | S217+S221, S4        |              | MAPK/ERK protein-serine kinase 1/2 (MKK1/2) + B23 (nucleophosmin, numatin, nucleolar protein NO38) | 760   | 26  | 1486  | 6   | 715   | 14  | 1004  | 25   | 1611  | 41  | 1319  | 19  | 762   | 2   | 1068  | 76  | 96   | -6  | 32  | -18 | -53 | -34    | Q02750 |        |
| 416 | NK100-1       | MEK2 (MAP2K2)     |                      | Pan-specific | MAPK/ERK protein-serine kinase 2 (MKK2)                                                            | 38825 | 14  | 33063 | 5   | 51170 | 12  | 41920 | 0    | 32108 | 10  | 46710 | 14  | 51795 | 9   | 46191 | 12  | -16  | -15 | 32  | 8   | 45  | 61     | -44    | P36507 |
| 417 | NK100-2       | MEK2 (MAP2K2)     |                      | Pan-specific | MAPK/ERK protein-serine kinase 2 (MKK2)                                                            | 1741  | 4   | 2308  | 0   | 1832  | 40  | 1598  | 18   | 1711  | 22  | 1663  | 3   | 1691  | 2   | 1462  | 29  | 33   | 5   | -8  | -3  | -1  | -15    | P36507 |        |
| 418 | NK100-3       | MEK2 (MAP2K2)     |                      | Pan-specific | MAPK/ERK protein-serine kinase 2 (MKK2)                                                            | 1652  | 30  | 2879  | 54  | 1626  | 15  | 1226  | 25   | 2384  | 24  | 1988  | 59  | 1215  | 11  | 1313  | 27  | 74   | -2  | -26 | -17 | -41 | -45    | P36507 |        |
| 419 | PK049-1       | MEK2 (MAP2K2)     | T394                 |              | MAPK/ERK protein-serine kinase 2 (MKK2) (human)                                                    | 34624 | 1   | 34624 | 22  | 4186  | 22  | 4186  | 9    | 32840 | 6   | 32840 | 9   | 43732 | 9   | 41312 | 23  | 0    | 5   | 28  | 17  | 33  | 26     | P36507 |        |
| 420 | PK049-2       | MEK2 (MAP2K2)     | T394                 |              | MAPK/ERK protein-serine kinase 2 (MKK2)                                                            | 34409 | 2   | 36221 | 11  | 43024 | 3   | 42106 | 1    | 34334 | 1   | 34942 | 4   | 42570 | 0   | 40099 | 0   | 0    | 5   | 25  | 23  | 15  | 24     | 17     | P36507 |
| 421 | PK050         | MEK2 (MAP2K2)     | T394                 |              | MAPK/ERK protein-serine kinase 2 (MKK2) (mouse)                                                    | 42992 | 0   | 34132 | 16  | 17821 | 11  | 24943 | 21   | 26396 | 3   | 21764 | 26  | 50581 | 0   | 38217 | 36  | -3   | -20 | -28 | -16 | 16  | -28    | Q02750 |        |
| 422 | NK101         | MEK3 (MAP2K3)     |                      | Pan-specific | MAPK/ERK protein-serine kinase 3 (MKK3)                                                            | 8102  | 0   | 8455  | 18  | 6513  | 6   | 5673  | 253  | 7266  | 32  | 4308  | 58  | 3601  | 10  | 3134  | 7   | 4    | -20 | -30 | -41 | -50 | -57    | P46734 |        |
| 423 | NK101-2       | MEK3 (MAP2K3)     |                      | Pan-specific | MAPK/ERK protein-serine kinase 3 (MKK3)                                                            | 5412  | 11  | 4746  | 42  | 5812  | 71  | 1882  | 16   | 6661  | 11  | 2800  | 24  | 2952  | 76  | 2681  | 27  | 3    | -12 | 7   | -65 | -58 | -66    | -60    | P46734 |
| 424 | NK101-3       | MEK3 (MAP2K3)     |                      | Pan-specific | MAPK/ERK protein-serine kinase 3 (MKK3)                                                            | 5691  | 7   | 6962  | 2   | 9099  | 35  | 3834  | 0    | 6949  | 41  | 6226  | 3   | 6028  | 26  | 6722  | 73  | 22   | 60  | -33 | -10 | -13 | -3     | P46734 |        |
| 425 | PK127         | MEK3 (MAP2K3)     | S218                 |              | MAPK/ERK protein-serine kinase 3 (MKK3)                                                            | 2064  | 16  | 2480  | 17  | 1552  | 10  | 2856  | 0    | 3749  | 10  | 2289  | 73  | 697   | 11  | 1884  | 93  | 20   | -25 | -38 | -39 | -81 | -50    | P46734 |        |
| 426 | PK051         | MEK3/6 (MAP2K3/6) | S218/S207            |              | MAPK/ERK protein-serine kinase 3/6 (MKK3/6)                                                        | 1499  | 66  | 2046  | 17  | 1399  | 30  | 779   | 13   | 1669  | 26  | 1343  | 8   | 1484  | 30  | 1223  | 93  | 37   | -7  | -48 | -20 | -11 | -27    | P46734 |        |
| 427 | PK051-2       | MEK3/6 (MAP2K3/6) | S218/S207            |              | MAPK/ERK protein-serine kinase 3/6 (MKK3/6)                                                        | 46701 | 12  | 46377 | 7   | 22177 | 8   | 36578 | 18   | 35125 | 3   | 29803 | 2   | 52692 | 2   | 49305 | 13  | -1   | -53 | -22 | -15 | 50  | 40     | P46734 |        |
| 428 | PK051-3       | MEK3/6 (MAP2K3/6) | S218/S207            |              | MAPK/ERK protein-serine kinase 3/6 (MKK3/6)                                                        | 26170 | 5   | 31164 | 14  | 27878 | 23  | 21490 | 15   | 23296 | 5   | 25673 | 34  | 23830 | 6   | 21642 | 15  | 19   | 6   | -18 | 10  | 2   | -7     | P46734 |        |
| 429 | NK102         | MEK3/6 (MAP2K3/6) |                      | Pan-specific | MAPK/ERK protein-serine kinase 3 beta isoform (MKK3 beta                                           |       |     |       |     |       |     |       |      |       |     |       |     |       |     |       |     |      |     |     |     |     |        |        |        |

|     |         |                  |              |                     |                                                                                |       |     |       |     |       |     |       |      |       |     |       |     |       |        |       |     |      |     |      |     |     |     |        |        |
|-----|---------|------------------|--------------|---------------------|--------------------------------------------------------------------------------|-------|-----|-------|-----|-------|-----|-------|------|-------|-----|-------|-----|-------|--------|-------|-----|------|-----|------|-----|-----|-----|--------|--------|
| 510 | PN057-1 | p53              |              | S392                | Tumor suppressor protein p53 (antigenNY-CO-13)                                 | 4129  | 18  | 7779  | 9   | 3716  | 17  | 4382  | 50   | 6510  | 24  | 5785  | 34  | 3621  | 23     | 10601 | 37  | 88   | -10 | 6    | -11 | -44 | 63  | P04637 |        |
| 511 | PN057-2 | p53              |              | S392                | Tumor suppressor protein p53 (antigenNY-CO-13)                                 | 20234 | 49  | 17576 | 56  | 27406 | 59  | 30573 | 10   | 21661 | 19  | 20537 | 15  | 24656 | 9      | 28053 | 27  | -13  | 35  | 51   | -5  | 14  | 30  | P04637 |        |
| 512 | PN057-3 | p53              |              | S392                | Tumor suppressor protein p53 (antigenNY-CO-13)                                 | 992   | 23  | 1459  | 29  | 765   | 1   | 914   | 13   | 1656  | 20  | 1061  | 20  | 876   | 39     | 745   | 69  | 47   | -23 | -8   | -36 | -47 | -55 | P04637 |        |
| 513 | NN123   | p73              | Pan-specific |                     | Tumor suppressor protein p73                                                   | 32746 | 7   | 34100 | 21  | 45885 | 4   | 27981 | 2    | 36725 | 8   | 32254 | 7   | 25318 | 8      | 31198 | 1   | 4    | 40  | -15  | -12 | -31 | -15 | Q15350 |        |
| 514 | NP008   | PAC1             | Pan-specific |                     | Dual specificity MAP kinase protein phosphatase                                | 9653  | 8   | 11859 | 16  | 11994 | 11  | 7954  | 3    | 9861  | 12  | 9108  | 14  | 7969  | 8      | 10298 | 10  | 23   | 24  | -18  | -8  | -19 | 4   | Q05923 |        |
| 515 | NN084   | PAC1             | Pan-specific |                     | Protein kinase C + casein kinase subunit in neurons protein 1                  | 13505 | 2   | 17715 | 23  | 9270  | 144 | 15663 | 98   | 11347 | 6   | 7296  | 44  | 7737  | 24     | 19682 | 17  | 31   | -31 | 15   | -36 | -32 | 73  | Q98Y11 |        |
| 516 | NK122   | PAK1             | Pan-specific |                     | p21-activated kinase 1 (alpha) (serine/threonine-protein kinase PAK 1)         | 13036 | 13  | 14563 | 66  | 15903 | 59  | 8404  | 3    | 12892 | 21  | 8673  | 29  | 7849  | 15     | 8644  | 7   | 12   | 22  | -36  | -33 | -39 | -33 | Q13153 |        |
| 517 | NK122-2 | PAK1             | Pan-specific |                     | p21-activated kinase 1 (alpha) (serine/threonine-protein kinase PAK 1)         | 880   | 54  | 1171  | 11  | 1427  | 20  | 634   | 83   | 974   | 16  | 1175  | 16  | 832   | 33     | 1352  | 21  | 33   | 62  | -28  | 21  | -15 | 39  | Q13153 |        |
| 518 | NK122-4 | PAK1             | Pan-specific |                     | p21-activated kinase 1 (alpha) (serine/threonine-protein kinase PAK 1)         | 745   | 18  | 6149  | 23  | 6128  | 13  | 7036  | 13   | 6128  | 26  | 6143  | 26  | 6143  | 26     | 6143  | 26  | 6143 | 26  | -17  | 34  | -39 | -45 | -12    | Q13153 |
| 519 | PK061   | PAK1/2/3         | Pan-specific | S144/S145/S154      | p21-activated kinase 1/2/3 (serine/threonine-protein kinase PAK 1/2/3)         | 4561  | 27  | 5063  | 20  | 7016  | 61  | 3770  | 54   | 5622  | 19  | 5075  | 18  | 5300  | 59     | 3447  | 19  | 26   | 54  | -17  | -10 | -4  | -39 | Q13153 |        |
| 520 | PK131   | PAK1/2/3         | Pan-specific | 1423/402/421        | p21-activated kinase 1/2/3 (serine/threonine-protein kinase PAK 1/2/3)         | 1784  | 1   | 3378  | 63  | 1753  | 41  | 1224  | 8    | 3287  | 50  | 1657  | 271 | 1555  | 22     | 3594  | 4   | 89   | -2  | -31  | -50 | -53 | 9   | Q13153 |        |
| 521 | NK200   | PAK2             | Pan-specific |                     | p21-activated kinase 2 (gamma) (serine/threonine-protein kinase PAK 2)         | 3383  | 100 | 1050  | 21  | 1594  | 37  | 739   | 30   | 2326  | 70  | 1240  | 43  | 1459  | 212    | 1469  | 2   | -69  | -53 | -78  | -47 | -37 | -37 | Q13177 |        |
| 522 | NK200-2 | PAK2             | Pan-specific |                     | p21-activated kinase 2 (gamma) (serine/threonine-protein kinase PAK 2)         | 10272 | 27  | 11871 | 5   | 8688  | 12  | 6130  | 9    | 16486 | 22  | 11004 | 6   | 9082  | 25     | 6881  | 33  | 16   | -15 | -40  | -23 | -45 | -58 | Q13177 |        |
| 523 | NK123   | PAK3             | Pan-specific |                     | p21-activated kinase 3 (beta) (serine/threonine-protein kinase PAK 3)          | 8427  | 5   | 9150  | 7   | 8207  | 7   | 5651  | 6    | 8704  | 8   | 6665  | 17  | 8339  | 26     | 6801  | 1   | 9    | -3  | -33  | -23 | -4  | -22 | Q75914 |        |
| 524 | NK190   | PAK5             | Pan-specific |                     | p21-activated kinase 5 (serine/threonine-protein kinase PAK 5)                 | 14396 | 96  | 26521 | 55  | 17038 | 3   | 23916 | 6    | 18477 | 5   | 19447 | 4   | 29109 | 26     | 16582 | 16  | 84   | 18  | 66   | 5   | 58  | -10 | Q9P286 |        |
| 525 | NK124   | PAK6             | Pan-specific |                     | p21-activated kinase 6 (serine/threonine-protein kinase PAK 6)                 | 23704 | 28  | 32552 | 24  | 19651 | 7   | 14735 | 25   | 24715 | 16  | 15965 | 3   | 17999 | 10     | 18784 | 16  | 37   | -18 | -36  | -35 | -27 | -24 | Q9NOU5 |        |
| 526 | NN085-1 | PARP1            | Pan-specific |                     | Poly (ADP-ribose) polymerase 1 (ADPRT)                                         | 4252  | 26  | 5661  | 31  | 5573  | 106 | 2637  | 13   | 7393  | 12  | 5201  | 69  | 6141  | 18     | 4388  | 41  | 33   | 31  | -38  | 30  | -17 | -41 | Q98974 |        |
| 527 | NN085-2 | PARP1            | Pan-specific |                     | Poly (ADP-ribose) polymerase 1 (ADPRT)                                         | 19002 | 13  | 10566 | 5   | 12076 | 24  | 28111 | 27   | 10569 | 32  | 6852  | 51  | 17246 | 65     | 12006 | 21  | -44  | -36 | 48   | -38 | 63  | 14  | Q98974 |        |
| 528 | PN058   | Pax2             | Pan-specific | S394                | Paired box protein 2                                                           | 1730  | 31  | 2169  | 11  | 1475  | 4   | 1265  | 33   | 1746  | 0   | 2134  | 52  | 1018  | 100    | 1874  | 2   | 21   | -18 | -29  | 22  | -42 | 7   | Q02692 |        |
| 529 | NP086   | Paxillin         | Pan-specific |                     | Paxillin                                                                       | 32931 | 12  | 19226 | 70  | 18516 | 17  | 32638 | 99   | 23978 | 9   | 23399 | 7   | 1650  | 76     | 17553 | 0   | -42  | -50 | 0    | -2  | -22 | -25 | P49023 |        |
| 530 | PN059   | Paxillin 1       | Pan-specific | Y31                 | Paxillin 1                                                                     | 27141 | 5   | 22703 | 74  | 29066 | 3   | 41219 | 8    | 24616 | 10  | 27301 | 5   | 30311 | 6      | 36251 | 2   | -16  | 7   | -21  | 11  | 23  | 47  | P49023 |        |
| 531 | PN060-1 | Paxillin 1       | Pan-specific | Y118                | Paxillin 1                                                                     | 28154 | 44  | 17572 | 64  | 31137 | 48  | 9083  | 201  | 30264 | 15  | 28623 | 28  | 36693 | 41     | 17925 | 55  | -38  | 11  | -68  | -12 | 21  | -41 | P49023 |        |
| 532 | PN060-2 | Paxillin 1       | Pan-specific | Y118                | Paxillin 1                                                                     | 12815 | 33  | 10772 | 10  | 12652 | 147 | 11255 | 50   | 12056 | 32  | 7800  | 21  | 6084  | 172    | 7640  | 54  | -15  | 0   | -11  | -35 | -50 | -37 | P49023 |        |
| 533 | NN087   | PCNA             | Pan-specific |                     | Proliferating cell nuclear antigen                                             | 18258 | 19  | 18647 | 8   | 12492 | 28  | 14089 | 12   | 16483 | 7   | 27784 | 104 | 36895 | 36     | 34284 | 57  | -9   | -32 | -23  | 69  | 124 | 108 | P12004 |        |
| 534 | NK125   | PCTK1 (PCTAIRE1) | Pan-specific |                     | PCTAIRE-1 protein-tyrosine kinase                                              | 6430  | 102 | 7216  | 30  | 6273  | 30  | 10417 | 915  | 13463 | 210 | 6748  | 311 | 3965  | 32     | 7912  | 88  | 12   | -2  | -62  | -50 | -71 | -41 | Q00536 |        |
| 535 | PK063   | PDGFRa           | Pan-specific | Y754                | Platelet-derived growth factor receptor kinase alpha                           | 44633 | 4   | 38096 | 25  | 17550 | 1   | 21680 | 17   | 39498 | 18  | 27136 | 49  | 46530 | 2      | 37629 | 26  | -15  | -61 | -51  | -31 | 18  | -5  | P16234 |        |
| 536 | PK064-2 | PDGFRa/b         | Pan-specific | Y572+Y574+Y579+Y581 | Platelet-derived growth factor receptor kinase alpha/beta                      | 10672 | 22  | 10391 | 37  | 22135 | 63  | 38885 | 4    | 19894 | 44  | 23822 | 24  | 23822 | 51     | 15499 | 42  | -47  | -42 | 12   | 97  | 32  | 20  | -22    | P16234 |
| 537 | PK065   | PDGFRb           | Pan-specific | Y716                | Platelet-derived growth factor receptor kinase beta                            | 11427 | 8   | 6429  | 47  | 10292 | 4   | 6480  | 27   | 17501 | 7   | 6269  | 51  | 5040  | 51     | 7651  | 169 | -44  | -10 | -43  | -64 | -71 | -56 | Q96919 |        |
| 538 | NN141-1 | PD1              | Pan-specific |                     | Protein disulfide-isomerase                                                    | 18653 | 16  | 22945 | 18  | 53948 | 3   | 16685 | 18   | 20115 | 8   | 14943 | 6   | 13196 | 5      | 16372 | 49  | 24   | -19 | -10  | -26 | -34 | -19 | P07237 |        |
| 539 | NK126-1 | PKA              | Pan-specific |                     | 3-phosphoinositide-dependent protein-serine kinase 1                           | 1533  | 29  | 2148  | 51  | 1463  | 24  | 1072  | 52   | 1651  | 34  | 4140  | 403 | 2014  | 381702 | 932   | 33  | 40   | -5  | -24  | 151 | 22  | -42 | Q15530 |        |
| 540 | PK062-1 | PKA              | Pan-specific |                     | 3-phosphoinositide-dependent protein-serine kinase 1                           | 7426  | 28  | 34012 | 73  | 7388  | 81  | 34012 | 32   | 11378 | 14  | 8233  | 78  | 6174  | 29     | 13566 | 2   | 2    | 66  | -59  | -64 | -29 | -15 | P33749 |        |
| 541 | PK066   | PKC1             | Pan-specific | S244                | 3-Phosphoinositide-dependent protein-serine kinase 1                           | 1171  | 38  | 2011  | 42  | 1098  | 21  | 9443  | 1515 | 955   | 4   | 1637  | 3   | 573   | 32     | 637   | 71  | 72   | -6  | -206 | 71  | -40 | -33 | Q15530 |        |
| 542 | PK061   | PKC1             | Pan-specific | S116                | Phosphoprotein-enriched in diabetes/astrocytes 15                              | 27566 | 40  | 10290 | 105 | 31541 | 0   | 32687 | 2    | 22591 | 3   | 16244 | 30  | 21860 | 21     | 14607 | 49  | -63  | 14  | 18   | -28 | -3  | -35 | Q15121 |        |
| 543 | NN088   | PERP             | Pan-specific |                     | p53-induced protein PIGPC1                                                     | 38241 | 6   | 17096 | 15  | 36371 | 104 | 16554 | 46   | 26562 | 70  | 16659 | 2   | 40907 | 23     | 20232 | 12  | -55  | -5  | -59  | -37 | 64  | -24 | Q9H230 |        |
| 544 | NN089   | PI3K             | Pan-specific |                     | Phosphatidylinositol 3-kinase regulatory subunit alpha                         | 45723 | 2   | 43700 | 21  | 43386 | 2   | 47605 | 5    | 37011 | 7   | 47037 | 6   | 49402 | 3      | 55263 | 18  | -4   | -5  | 4    | 27  | 33  | 49  | P27986 |        |
| 545 | NK191   | PI3K p110 delta  | Pan-specific |                     | Phosphatidylinositol 4,5-bisphosphate 3-kinase catalytic subunit delta isoform | 16816 | 15  | 40847 | 36  | 19264 | 18  | 24527 | 33   | 23500 | 14  | 25722 | 225 | 14100 | 3      | 21805 | 34  | 143  | 15  | 46   | 9   | -40 | -7  | Q00329 |        |
| 546 | PN127   | PI3K p85/p55     | Pan-specific | Y467/Y199           | Phosphatidylinositol 3-kinase regulatory subunit alpha                         | 794   | 75  | 2784  | 70  | 951   | 19  | 1432  | 14   | 1093  | 11  | 2398  | 72  | 787   | 18     | 938   | 11  | 251  | 20  | 80   | 169 | -28 | -14 | P27986 |        |
| 547 | NN114   | PI3KR4           | Pan-specific |                     | Phosphoinositide 3-kinase, regulatory subunit 4                                | 3893  | 34  | 3400  | 5   | 3327  | 12  | 2201  | 2    | 3192  | 9   | 4000  | 18  | 2342  | 32     | 3140  | 8   | -13  | -15 | -43  | 25  | -27 | -2  | Q99570 |        |
| 548 | NK192   | PI4KCB           | Pan-specific |                     | phosphatidylinositol 4-kinase, catalytic, beta polypeptide                     | 1485  | 11  | 3221  | 11  | 2227  | 44  | 3111  | 98   | 1569  | 4   | 1804  | 5   | 6303  | 83     | 13519 | 709 | 117  | 50  | 110  | 15  | 302 | 762 | Q5VWC1 |        |
| 549 | NK209   | PIPK2a           | Pan-specific |                     | Phosphatidylinositol 4-phosphatase 5-kinase type 2 alpha                       | 6943  | 15  | 4859  | 34  | 9646  | 42  | 15543 | 666  | 12787 | 39  | 5401  | 109 | 6322  | 61     | 5631  | 207 | -30  | 39  | 124  | -58 | -51 | -56 | P48426 |        |
| 550 | NK193   | PIPK2b           | Pan-specific |                     | PI3LRRE serine/threonine-protein kinase CDC2L1                                 | 10828 | 368 | 9407  | 24  | 6827  | 18  | 7700  | 6    | 10848 | 20  | 16347 | 413 | 6     | 3369   | 55    | 44  | -1   | 15  | 54   | -4  | -56 | -68 | P48426 |        |
| 551 | NK127-1 | PKA Cab          | Pan-specific |                     | cAMP-dependent protein-serine kinase catalytic subunit alpha/beta              | 44232 | 8   | 39136 | 30  | 45689 | 37  | 45439 | 11   | 38451 | 10  | 49403 | 6   | 49556 | 10     | 45798 | 13  | -12  | 3   | 36   | 36  | 26  | 26  | P17612 |        |
| 552 | NK127-2 | PKA Cab          | Pan-specific |                     | cAMP-dependent protein-serine kinase catalytic subunit alpha/beta              | 18581 | 34  | 13888 | 50  | 12730 | 1   | 16128 | 16   | 16226 | 27  | 13105 | 15  | 9775  | 3      | 12616 | 67  | -31  | -13 | -19  | -40 | -22 | 21  | P17612 |        |
| 553 | PK067   | PKA Cab          | Pan-specific | T197                | cAMP-dependent protein-serine kinase catalytic subunit alpha/beta              | 45270 | 11  | 48323 | 1   | 20021 | 7   | 33664 | 8    | 41723 | 2   | 48038 | 3   | 53619 | 3      | 57941 | 1   | 7    | -56 | -26  | 15  | 29  | 39  | P17612 |        |
| 554 | PK068   | PKA Cb           | Pan-specific | S338                | cAMP-dependent protein-serine kinase catalytic subunit beta                    | 8284  | 5   | 8567  | 19  | 3081  | 38  | 22151 | 150  | 9750  | 40  | 8351  | 55  | 7159  | 78     | 6910  | 21  | 3    | -63 | 167  | -14 | -27 | 3   | P22694 |        |
| 555 | NN116   | PKA R1a          | Pan-specific |                     | cAMP-dependent protein-serine kinase type 1-alpha regulatory chain             | 13370 | 27  | 20405 | 943 | 20021 | 17  | 21937 | 53   | 17268 | 28  | 21831 | 71  | 8955  | 80     | 12456 | 14  | 53   | 50  | 64   | 26  | -48 | -28 | P10644 |        |
| 556 | NK128   | PKA R2a          | Pan-specific |                     | cAMP-dependent protein-serine kinase regulatory type 2 subunit alpha           | 4030  | 27  | 12673 | 1   | 11172 | 25  | 14229 | 78   | 7662  | 25  | 1139  | 30  | 5958  | 46     | 13421 | 34  | 214  | 177 | 253  | -65 | -22 | -56 | P13861 |        |
| 557 | PK069   | PKA R2a          | Pan-specific | S98                 | cAMP-dependent protein-serine kinase regulatory type 2 subunit alpha           | 5633  | 38  | 6398  | 11  | 8198  | 60  | 3020  | 6    | 7644  | 42  | 5887  | 11  | 4347  | 18     | 7213  | 9   | 14   | 46  | -46  | -23 | -43 | -6  | P13861 |        |
| 558 | NK129   | PKBa (Akt1)      | Pan-specific |                     | Protein-serine kinase B alpha                                                  | 30942 | 5   | 31592 | 5   | 43392 | 3   | 36448 | 2    | 34619 | 2   | 33386 | 7   | 34980 | 9      | 38388 | 8   | 2    | 40  | 18   | -4  | 1   | 11  | P31749 |        |
| 559 | NK129-2 | PKBa (Akt1)      | Pan-specific |                     | Protein-serine kinase B alpha                                                  | 2854  | 189 | 18106 | 82  | 3549  | 7   | 10158 | 1107 | 4055  | 51  | 1021  | 75  | 1933  | 25     | 1794  | 22  | 534  | 24  | 256  | 75  | -52 | -56 | P31749 |        |
| 560 | PK071-1 | PKBa (Akt1)      | Pan-specific | T308</              |                                                                                |       |     |       |     |       |     |       |      |       |     |       |     |       |        |       |     |      |     |      |     |     |     |        |        |

|     |             |                       |                |                                                                                                                            |       |     |       |     |       |     |       |     |       |     |       |     |       |    |       |     |      |     |     |      |     |     |        |        |
|-----|-------------|-----------------------|----------------|----------------------------------------------------------------------------------------------------------------------------|-------|-----|-------|-----|-------|-----|-------|-----|-------|-----|-------|-----|-------|----|-------|-----|------|-----|-----|------|-----|-----|--------|--------|
| 641 | NP021-2     | PP6C                  | Pan-specific   | Protein-serine phosphatase 5 - catalytic subunit (PPT)                                                                     | 2382  | 39  | 7152  | 87  | 2914  | 40  | 8313  | 156 | 3366  | 24  | 6591  | 24  | 1915  | 15 | 3078  | 25  | 200  | 22  | 249 | 96   | -43 | -9  | P53041 |        |
| 642 | NP022       | PP6C                  | Pan-specific   | Protein-serine phosphatase 6 - catalytic subunit (PPVC)                                                                    | 7755  | 27  | 16746 | 45  | 13418 | 41  | 10163 | 6   | 10271 | 18  | 10039 | 214 | 8477  | 19 | 11329 | 25  | 116  | 73  | 31  | -2   | -18 | 10  | O00743 |        |
| 643 | NP022-2     | PP6C                  | Pan-specific   | Protein-serine phosphatase 6 - catalytic subunit (PPVC)                                                                    | 4486  | 33  | 17755 | 102 | 7001  | 43  | 8232  | 2   | 8146  | 13  | 11917 | 55  | 4728  | 41 | 15686 | 4   | 296  | 56  | 84  | -46  | -42 | 93  | O00743 |        |
| 644 | PN062       | PRAS40                | T246           | Proline-rich Akt substrate 40 kDa (Akt1S1)                                                                                 | 33340 | 4   | 33194 | 7   | 36636 | 3   | 40090 | 5   | 29226 | 1   | 36744 | 13  | 37257 | 17 | 39268 | 3   | 0    | 10  | 20  | 26   | 27  | 34  | Q06636 |        |
| 645 | NK148       | PRK1 (PKN1)           | Pan-specific   | Protein kinase C-related protein-serine kinase 1                                                                           | 5251  | 38  | 7736  | 3   | 13641 | 296 | 5487  | 8   | 5749  | 69  | 1823  | 1   | 4133  | 38 | 3673  | 2   | 47   | 160 | 5   | -68  | -28 | -36 | Q16512 |        |
| 646 | PK095-PK096 | PRK12 (PKN12)         | T774, T816     | Protein kinase C-related protein-serine kinase 1/2                                                                         | 2061  | 0   | 4990  | 18  | 2790  | 8   | 3710  | 186 | 2512  | 42  | 2227  | 140 | 1115  | 88 | 1684  | 1   | 142  | 35  | 80  | -11  | -56 | -33 | Q16512 |        |
| 647 | NK149       | PRK2 (PKN2)           | Pan-specific   | Protein kinase C-related protein-serine kinase 2                                                                           | 6549  | 21  | 22989 | 25  | 15660 | 434 | 14344 | 68  | 16135 | 307 | 20898 | 53  | 6201  | 37 | 20857 | 6   | 251  | 139 | 119 | 30   | -62 | 29  | Q16513 |        |
| 648 | NK149-2     | PRK2 (PKN2)           | Pan-specific   | Protein kinase C-related protein-serine kinase 2                                                                           | 7743  | 17  | 8443  | 1   | 7927  | 20  | 4249  | 20  | 11849 | 21  | 8887  | 4   | 5547  | 1  | 5311  | 13  | 9    | 2   | -45 | -25  | -53 | -55 | Q16513 |        |
| 649 | NK150       | PRKAB1                | Pan-specific   | 5-AMP-activated protein kinase (AMPK), beta-1 regulatory subunit                                                           | 41300 | 1   | 43694 | 4   | 46542 | 27  | 43353 | 4   | 3745  | 4   | 31637 | 52  | 48414 | 6  | 45935 | 3   | 6    | 13  | 5   | -16  | 28  | 22  | Q06124 |        |
| 650 | NK151       | PRKWNK4               | Pan-specific   | Putative protein-serine kinase WNK4                                                                                        | 60255 | 19  | 62565 | 19  | 4555  | 18  | 11059 | 19  | 6117  | 44  | 42320 | 16  | 2748  | 59 | 7660  | 53  | 115  | 20  | -24 | 84   | -62 | -55 | 25     | Q06102 |
| 651 | PN104       | Progesterone Receptor | S294           | Progesterone receptor                                                                                                      | 12125 | 52  | 5749  | 40  | 19890 | 72  | 22598 | 149 | 12398 | 24  | 5529  | 284 | 18618 | 35 | 7784  | 1   | -53  | 64  | 86  | -55  | 50  | -37 | Q06401 |        |
| 652 | NK152       | PRPK                  | Pan-specific   | Protein-serine kinase PRP4 homolog                                                                                         | 2596  | 50  | 9295  | 18  | 3223  | 8   | 3081  | 1   | 5496  | 33  | 7265  | 87  | 2664  | 24 | 6892  | 25  | 258  | 24  | 19  | 32   | -52 | 25  | Q13523 |        |
| 653 | NN142       | PSD-95                | Pan-specific   | Disks large homolog 4                                                                                                      | 2129  | 7   | 4930  | 48  | 3482  | 1   | 3039  | 21  | 5817  | 31  | 7099  | 77  | 3000  | 22 | 3554  | 20  | 132  | 64  | 43  | 22   | -48 | -39 | P78352 |        |
| 654 | NK204       | PSTAIR                | Pan-specific   | PSTAIR                                                                                                                     | 1382  | 1   | 1792  | 29  | 1761  | 6   | 1414  | 20  | 2256  | 0   | 2238  | 27  | 1314  | 27 | 1852  | 13  | 30   | 27  | 2   | -1   | -42 | -18 | NA     |        |
| 655 | NP023       | PTEN                  | Pan-specific   | Phosphatidylinositol-3,4,5-trisphosphate 3-phosphatase and protein phosphatase and tensin homolog deleted on chromosome 10 | 14855 | 2   | 21897 | 62  | 17565 | 39  | 19427 | 87  | 18137 | 17  | 6548  | 79  | 9501  | 22 | 13525 | 25  | 47   | 18  | 31  | -64  | -48 | -25 | P60484 |        |
| 656 | NP023-2     | PTEN                  | Pan-specific   | Phosphatidylinositol-3,4,5-trisphosphate 3-phosphatase and protein phosphatase and tensin homolog deleted on chromosome 10 | 1515  | 15  | 1384  | 29  | 1080  | 32  | 766   | 40  | 1303  | 83  | 2957  | 83  | 693   | 33 | 870   | 17  | -9   | -29 | -49 | -127 | -47 | -33 | P60484 |        |
| 657 | PP003       | PTEN                  | S380+T382+S385 | Phosphatidylinositol-3,4,5-trisphosphate 3-phosphatase and protein phosphatase and tensin homolog deleted on chromosome 10 | 33943 | 1   | 29358 | 4   | 28212 | 33  | 37167 | 8   | 32971 | 5   | 36073 | 8   | 39322 | 1  | 40023 | 3   | -14  | -17 | 10  | 9    | 19  | 21  | P60484 |        |
| 658 | NP024       | PTP1B                 | Pan-specific   | Protein-tyrosine phosphatase 1B                                                                                            | 36261 | 4   | 27662 | 14  | 48285 | 31  | 44972 | 7   | 40092 | 19  | 41910 | 7   | 47527 | 1  | 39092 | 24  | -28  | 33  | 24  | 5    | 19  | -2  | P18031 |        |
| 659 | NP025       | PTP1C                 | Pan-specific   | Protein-tyrosine phosphatase 1C (SHP1, SHPTP1)                                                                             | 45255 | 2   | 44024 | 11  | 45770 | 30  | 46527 | 4   | 39579 | 4   | 50464 | 4   | 52351 | 2  | 50303 | 2   | -3   | 1   | 3   | 28   | 32  | 27  | P29350 |        |
| 660 | NP026       | PTP1D                 | Pan-specific   | Protein-tyrosine phosphatase 1D (SHP2, SHPTP2, Syp, PTP2C)                                                                 | 41300 | 1   | 43694 | 4   | 46542 | 27  | 43353 | 4   | 3745  | 4   | 31637 | 52  | 48414 | 6  | 45935 | 3   | 6    | 13  | 5   | -16  | 28  | 22  | Q06124 |        |
| 661 | NP026-2     | PTP1D                 | Pan-specific   | Protein-tyrosine phosphatase 1D (SHP2, SHPTP2, Syp, PTP2C)                                                                 | 18054 | 2   | 19260 | 13  | 30390 | 149 | 28348 | 49  | 21008 | 33  | 10135 | 151 | 13215 | 5  | 16701 | 6   | 7    | 68  | 57  | 2    | -2  | -21 | O61124 |        |
| 662 | NP036       | PTPDI                 | Pan-specific   | Protein-tyrosine phosphatase non-receptor type 21                                                                          | 19682 | 26  | 26076 | 0   | 17930 | 8   | 17498 | 3   | 18678 | 12  | 27457 | 14  | 14982 | 1  | 25760 | 50  | 32   | -9  | -11 | 47   | -20 | 38  | Q16825 |        |
| 663 | NK153       | PyDK2 (PDHK2)         | Pan-specific   | Pyruvate dehydrogenase kinase isoform 2                                                                                    | 4529  | 25  | 6854  | 57  | 3221  | 18  | 2425  | 16  | 2955  | 41  | 3240  | 19  | 2931  | 24 | 6043  | 51  | 251  | -9  | -29 | -46  | 10  | -1  | 104    | Q15119 |
| 664 | NK154       | Pyk2                  | Pan-specific   | Protein-tyrosine kinase 2                                                                                                  | 12936 | 8   | 12827 | 12  | 9746  | 16  | 8662  | 4   | 11211 | 4   | 12247 | 16  | 7354  | 20 | 8240  | 4   | -1   | -25 | -49 | 9    | -34 | -26 | Q14289 |        |
| 665 | NK154-2     | Pyk2                  | Pan-specific   | Protein-tyrosine kinase 2                                                                                                  | 40671 | 7   | 38032 | 5   | 42883 | 30  | 46059 | 1   | 32510 | 12  | 29645 | 54  | 48057 | 3  | 44516 | 10  | -6   | 5   | 13  | -9   | 48  | 37  | Q14289 |        |
| 666 | PK097-2     | Pyk2                  | Y579           | Protein-tyrosine kinase 2                                                                                                  | 30016 | 1   | 30603 | 11  | 27561 | 131 | 36566 | 2   | 29043 | 20  | 32006 | 18  | 24004 | 95 | 32745 | 29  | 2    | -8  | 22  | 10   | -17 | 13  | Q14289 |        |
| 667 | NN150       | Rab5                  | Pan-specific   | Ras-related protein Rab-5A                                                                                                 | 2626  | 11  | 6010  | 9   | 3347  | 23  | 2675  | 3   | 9719  | 169 | 3975  | 30  | 2031  | 62 | 3476  | 14  | 129  | 27  | 2   | -59  | 79  | -64 | P20339 |        |
| 668 | NN150-2     | Rab5                  | Pan-specific   | Ras-related protein Rab-5A                                                                                                 | 13628 | 31  | 25983 | 3   | 60304 | 1   | 13676 | 1   | 12692 | 29  | 17963 | 52  | 12582 | 8  | 16815 | 24  | 91   | 343 | 0   | 42   | -1  | 32  | P20339 |        |
| 669 | NN092-1     | Rac1                  | Pan-specific   | Ras-related G3 botulinum toxin substrate 1                                                                                 | 43764 | 1   | 42377 | 5   | 44809 | 3   | 45241 | 2   | 44808 | 9   | 47339 | 7   | 48952 | 1  | 46325 | 11  | -3   | 2   | 23  | 25   | -29 | -22 | Q03053 |        |
| 670 | NP059-2     | Rac1                  | S71            | Ras-related G3 botulinum toxin substrate 1                                                                                 | 27630 | 5   | 26274 | 16  | 27961 | 25  | 33849 | 1   | 24908 | 2   | 22744 | 74  | 27902 | 6  | 30848 | 6   | -5   | 2   | 3   | -8   | 12  | 24  | Q13548 |        |
| 671 | PK154       | Rac1                  | S845           | Ras-related G3 botulinum toxin substrate 1                                                                                 | 7710  | 26  | 7710  | 23  | 42338 | 10  | 39839 | 4   | 42559 | 3   | 1091  | 2   | 883   | 7  | 8245  | 15  | 1245 | 3   | 3   | -16  | 29  | 19  | Q13548 |        |
| 672 | NK155-2     | Raf1                  | Pan-specific   | Raf1 proto-oncogene-encoded protein-serine kinase                                                                          | 985   | 2   | 1727  | 13  | 1256  | 56  | 855   | 0   | 2417  | 270 | 1444  | 31  | 1205  | 35 | 1073  | 34  | 75   | 28  | -13 | -40  | -50 | -56 | P04049 |        |
| 673 | NK155-3     | Raf1                  | Pan-specific   | Raf1 proto-oncogene-encoded protein-serine kinase                                                                          | 9313  | 43  | 15003 | 35  | 11829 | 13  | 7654  | 5   | 12928 | 20  | 9852  | 7   | 14358 | 13 | 11450 | 23  | 61   | 27  | -18 | -24  | 11  | -11 | P04049 |        |
| 674 | NK155-4     | Raf1                  | Pan-specific   | Raf1 proto-oncogene-encoded protein-serine kinase                                                                          | 6963  | 16  | 8308  | 19  | 4860  | 2   | 4623  | 22  | 6422  | 83  | 5374  | 119 | 3506  | 17 | 7508  | 26  | 19   | -30 | -34 | -16  | -45 | 17  | P04049 |        |
| 675 | PK098       | Raf1                  | S259           | Raf1 proto-oncogene-encoded protein-serine kinase                                                                          | 1402  | 40  | 4159  | 23  | 2800  | 33  | 3636  | 66  | 3121  | 31  | 2874  | 68  | 1559  | 56 | 1911  | 55  | 197  | 100 | 159 | -8   | -50 | -39 | P04049 |        |
| 676 | NK205       | RafA (Araf)           | Pan-specific   | A-Raf proto-oncogene serine/threonine-protein kinase                                                                       | 2400  | 33  | 4582  | 52  | 3221  | 46  | 6597  | 40  | 6282  | 10  | 6329  | 59  | 2363  | 23 | 3474  | 1   | 60   | 34  | 131 | 1    | -62 | -45 | P10398 |        |
| 677 | NK205-2     | RafA (Araf)           | Pan-specific   | A-Raf proto-oncogene serine/threonine-protein kinase                                                                       | 10440 | 6   | 10992 | 21  | 8958  | 7   | 5506  | 20  | 6251  | 36  | 7510  | 34  | 8012  | 22 | 8281  | 8   | 5    | -14 | -47 | 20   | -4  | -32 | P10398 |        |
| 678 | NK156       | RafB (Braf)           | Pan-specific   | RafB proto-oncogene-encoded protein-serine kinase                                                                          | 8027  | 16  | 9704  | 6   | 13880 | 6   | 11505 | 16  | 9441  | 0   | 11083 | 0   | 8213  | 7  | 14559 | 38  | 21   | 73  | 43  | 17   | -13 | 54  | P15056 |        |
| 679 | NK156-2     | RafB (Braf)           | Pan-specific   | RafB proto-oncogene-encoded protein-serine kinase                                                                          | 1141  | 10  | 2122  | 16  | 1738  | 61  | 1848  | 20  | 2166  | 18  | 3003  | 36  | 1127  | 48 | 3458  | 82  | 86   | 52  | 62  | 39   | -48 | 60  | P15056 |        |
| 680 | NN093       | Rb                    | Pan-specific   | Retinoblastoma-associated protein 1                                                                                        | 45035 | 4   | 33981 | 23  | 37848 | 1   | 41131 | 7   | 36903 | 7   | 46454 | 4   | 50774 | 4  | 60142 | 5   | -25  | -16 | -9  | 27   | -39 | 64  | P06400 |        |
| 681 | PK099       | Rb                    | S71            | Retinoblastoma-associated protein 1                                                                                        | 26356 | 20  | 36190 | 20  | 36190 | 52  | 20227 | 30  | 21127 | 1   | 32182 | 0   | 27608 | 0  | 27608 | 0   | 25   | 0   | 31  | 92   | 19  | 42  | P06400 |        |
| 682 | PN068       | Rb                    | S612           | Retinoblastoma-associated protein 1                                                                                        | 46474 | 9   | 48100 | 5   | 18119 | 2   | 31524 | 5   | 31087 | 7   | 48069 | 1   | 50732 | 5  | 46425 | 1   | 3    | -61 | -32 | 55   | 63  | -49 | P06400 |        |
| 683 | PK097       | Rb                    | S780           | Retinoblastoma-associated protein 1                                                                                        | 1715  | 11  | 3781  | 50  | 2824  | 37  | 2132  | 37  | 2412  | 20  | 3105  | 18  | 1693  | 46 | 6135  | 386 | 120  | 29  | 53  | 24   | 29  | -30 | 154    | P06400 |
| 684 | PN068       | Rb                    | S807           | Retinoblastoma-associated protein 1                                                                                        | 9122  | 34  | 16461 | 43  | 14881 | 35  | 19220 | 13  | 18078 | 26  | 31321 | 5   | 26183 | 26 | 41042 | 25  | 80   | 63  | 111 | 73   | 45  | 127 | P06400 |        |
| 685 | PN069       | Rb                    | S807+S811      | Retinoblastoma-associated protein 1                                                                                        | 2471  | 23  | 6935  | 19  | 4472  | 13  | 10601 | 54  | 2702  | 7   | 16220 | 28  | 2304  | 30 | 14728 | 8   | 181  | 81  | 329 | 500  | -15 | 445 | P06400 |        |
| 686 | PN070       | Rb                    | T821           | Retinoblastoma-associated protein 1                                                                                        | 11450 | 8   | 28292 | 18  | 35681 | 4   | 37664 | 1   | 31093 | 5   | 30739 | 4   | 32967 | 11 | 30637 | 37  | 147  | 212 | 229 | -1   | 6   | -1  | P06400 |        |
| 687 | PN071       | Rb                    | T826           | Retinoblastoma-associated protein 1                                                                                        | 29474 | 8   | 37224 | 18  | 18577 | 1   | 17139 | 3   | 26882 | 11  | 35098 | 4   | 32320 | 30 | 41330 | 2   | -26  | -37 | -42 | -31  | 20  | 54  | P06400 |        |
| 688 | PN113       | Rb                    | S608           | Retinoblastoma-associated protein 1                                                                                        | 5827  | 129 | 3107  | 79  | 3096  | 27  | 2260  | 65  | 5776  | 220 | 8439  | 120 | 12502 | 75 | 5725  | 7   | -47  | -47 | -61 | 46   | 116 | -1  | P06400 |        |
| 689 | PN131       | Rb                    | S795           | Retinoblastoma-associated protein 1                                                                                        | 1667  | 20  | 2088  | 27  | 1659  | 16  | 1197  | 18  | 1439  | 4   | 3416  | 66  | 926   | 6  | 4110  | 219 | 25   | 0   | -28 | 137  | -36 | 185 | P06400 |        |
| 690 | NK157       | RIP2/RICK             | Pan-specific   | Receptor-interacting serine/threonine-protein kinase 2 (RIPK2)                                                             | 42677 | 3   | 32367 | 35  | 38886 | 2   | 38504 | 5   | 36562 | 2   | 39459 | 4   | 50506 | 2  | 56955 | 2   | -24  | -9  | -10 | 8    | 28  | 56  | Q43362 |        |
| 691 | NK158       | RIPK1                 | Pan-specific   | Receptor-interacting serine/threonine-protein kinase 1                                                                     | 40555 | 28  | 42081 | 5   | 50666 | 7   | 38212 | 2   | 44461 | 1   | 40990 | 40  | 54199 | 2  | 54113 | 10  | 4    | 25  | -6  | 8    | 22  | 22  | Q13548 |        |
| 692 | PK101-1     | ROCK1 (ROCK2)         | Pan-specific   | RhoA protein-serine kinase alpha                                                                                           | 45672 | 2   | 48218 | 4   | 4     | 4   | 4     | 10  | 39839 | 4   | 42559 | 3   | 1091  | 2  | 883   | 7   | 8245 |     |     |      |     |     |        |        |

|     |         |                      |              |                                                                                               |       |     |       |     |       |     |       |     |       |     |       |     |       |     |       |    |     |     |     |     |     |     |        |        |
|-----|---------|----------------------|--------------|-----------------------------------------------------------------------------------------------|-------|-----|-------|-----|-------|-----|-------|-----|-------|-----|-------|-----|-------|-----|-------|----|-----|-----|-----|-----|-----|-----|--------|--------|
| 772 | PN090   | Tau                  | S712         | Microtubule-associated protein tau                                                            | 22689 | 34  | 8851  | 66  | 32915 | 17  | 31448 | 13  | 16726 | 45  | 8416  | 34  | 32153 | 38  | 25979 | 25 | -61 | 45  | 39  | -50 | 92  | 55  | P10636 |        |
| 773 | PN090-2 | Tau                  | S712         | Microtubule-associated protein tau                                                            | 17087 | 81  | 21074 | 24  | 22134 | 29  | 28459 | 24  | 21233 | 15  | 23007 | 30  | 22979 | 15  | 7846  | 84 | 23  | 30  | 67  | 8   | 8   | -63 | P10636 |        |
| 774 | PN091   | Tau                  | S716         | Microtubule-associated protein tau                                                            | 15869 | 70  | 11300 | 7   | 6670  | 27  | 26038 | 26  | 14538 | 41  | 15257 | 38  | 16205 | 4   | 6815  | 38 | -29 | -58 | 64  | 5   | 5   | -53 | P10636 |        |
| 775 | PN092   | Tau                  | S720         | Microtubule-associated protein tau                                                            | 41918 | 3   | 38926 | 21  | 46528 | 0   | 41508 | 9   | 31771 | 16  | 45480 | 10  | 46676 | 2   | 51947 | 7  | -7  | 11  | -1  | 43  | 44  | 64  | P10636 |        |
| 776 | PN106   | Tau                  | S518         | Microtubule-associated protein tau                                                            | 2896  | 63  | 2762  | 5   | 1373  | 8   | 1971  | 34  | 2009  | 24  | 2743  | 17  | 1135  | 21  | 2721  | 49 | -5  | -53 | -32 | 37  | -44 | 35  | P10636 |        |
| 777 | PN107   | Tau                  | S738         | Microtubule-associated protein tau                                                            | 41324 | 12  | 23857 | 82  | 42803 | 13  | 40573 | 9   | 33115 | 8   | 31962 | 15  | 41400 | 7   | 33307 | 6  | -42 | 4   | -2  | -3  | 25  | 1   | P10636 |        |
| 778 | PN122   | Tau                  | T547         | Microtubule-associated protein tau                                                            | 1954  | 1   | 2516  | 3   | 2128  | 31  | 10122 | 569 | 4504  | 20  | 3917  | 40  | 3276  | 227 | 2491  | 28 | 29  | 9   | 418 | -13 | -27 | -45 | P10636 |        |
| 779 | NK220-1 | TBK1                 | Pan-specific | Serine/threonine-protein kinase TBK1                                                          | 3697  | 6   | 14617 | 119 | 3668  | 15  | 5246  | 45  | 7688  | 44  | 8568  | 91  | 3246  | 2   | 7556  | 26 | 295 | -1  | 42  | 11  | -58 | -2  | Q9UHJ2 |        |
| 780 | NK220-2 | TBK1                 | Pan-specific | Serine/threonine-protein kinase TBK1                                                          | 8402  | 11  | 13605 | 46  | 8479  | 44  | 6595  | 5   | 9687  | 32  | 12808 | 136 | 2821  | 16  | 8101  | 19 | 63  | 1   | -21 | 30  | -71 | -18 | Q9UHJ2 |        |
| 781 | NK176   | TEK (TIE2)           | Pan-specific | Angiopoietin 1 receptor-tyrosine kinase                                                       | 6174  | 148 | 4890  | 67  | 2599  | 63  | 4086  | 59  | 8716  | 49  | 4889  | 37  | 3106  | 13  | 4475  | 31 | -21 | -58 | -34 | -44 | -64 | -49 | Q02763 |        |
| 782 | NK177   | Trk1                 | Pan-specific | Tousled-like protein-serine kinase 1                                                          | 4712  | 23  | 5265  | 51  | 4019  | 16  | 3812  | 92  | 3650  | 35  | 2727  | 11  | 2960  | 21  | 2521  | 50 | 12  | -15 | -19 | -25 | -19 | -31 | Q9UKI8 |        |
| 783 | NP034   | TRIPb                | Pan-specific | Phosphatidylinositol-3,4,5-trisphosphate 3-phosphatase TPTE2                                  | 1779  | 52  | 3279  | 43  | 2729  | 28  | 2418  | 279 | 2835  | 18  | 2172  | 32  | 1630  | 56  | 2120  | 42 | 84  | 53  | 36  | -23 | -43 | -25 | Q6XP53 |        |
| 784 | NN110   | TRADD                | Pan-specific | Tumor necrosis factor receptor type 1 associated DEATH domain protein                         | 44026 | 14  | 42364 | 5   | 50608 | 9   | 40152 | 15  | 35601 | 1   | 46919 | 1   | 52917 | 7   | 47234 | 8  | -4  | 15  | -9  | 29  | 49  | 33  | Q15628 |        |
| 785 | NN111   | Trail                | Pan-specific | Tumor necrosis factor-related apoptosis-inducing ligand                                       | 14914 | 23  | 17944 | 9   | 13087 | 6   | 11488 | 14  | 11776 | 5   | 10426 | 33  | 10930 | 1   | 14202 | 14 | 20  | -12 | -23 | -11 | -7  | 21  | P05091 |        |
| 786 | NK178   | TrkA                 | Pan-specific | Nerve growth factor (NGF) receptor-tyrosine kinase                                            | 3778  | 48  | 2328  | 9   | 4776  | 67  | 2052  | 26  | 6249  | 31  | 2198  | 9   | 2431  | 96  | 1723  | 42 | -38 | 26  | -46 | -65 | -61 | -72 | P04629 |        |
| 787 | NK179   | TrkB                 | Pan-specific | BDNF/NT3/4/5 receptor- tyrosine kinase                                                        | 16131 | 15  | 14013 | 36  | 15674 | 19  | 16654 | 13  | 11835 | 5   | 16820 | 44  | 14251 | 28  | 21473 | 16 | -13 | -3  | 3   | 42  | 20  | 81  | Q16620 |        |
| 788 | NK180   | TTK                  | Pan-specific | Dual specificity protein kinase                                                               | 10059 | 13  | 12767 | 24  | 9677  | 40  | 6068  | 74  | 11974 | 28  | 7344  | 24  | 18018 | 37  | 7027  | 30 | 27  | -4  | -40 | -39 | 50  | -41 | P33981 |        |
| 789 | NK181   | Tyk2                 | Pan-specific | Protein-tyrosine kinase 2 (Jak-related)                                                       | 7930  | 86  | 16377 | 15  | 7314  | 33  | 4713  | 25  | 10056 | 39  | 7966  | 7   | 5827  | 30  | 7402  | 26 | 107 | -8  | -41 | -21 | -42 | -26 | P29597 |        |
| 790 | NK181-2 | Tyk2                 | Pan-specific | Protein-tyrosine kinase 2 (Jak-related)                                                       | 7447  | 15  | 9027  | 4   | 3199  | 50  | 5183  | 47  | 7825  | 8   | 6390  | 4   | 4217  | 23  | 5252  | 7  | 21  | -57 | -30 | -18 | -46 | -33 | P29597 |        |
| 791 | NK183-1 | Tyro10 (DDR2)        | Pan-specific | Neurotrophic receptor-tyrosine kinase of discoidin domain receptor family, member 2 precursor | 5343  | 43  | 4947  | 18  | 3340  | 7   | 2555  | 1   | 7655  | 11  | 3190  | 18  | 3091  | 22  | 2877  | 9  | -7  | -37 | -52 | -58 | -60 | -62 | Q16832 |        |
| 792 | NK183-2 | Tyro10 (DDR2)        | Pan-specific | Neurotrophic receptor-tyrosine kinase of discoidin domain receptor family, member 2 precursor | 6864  | 152 | 6932  | 21  | 10955 | 39  | 6788  | 189 | 5112  | 21  | 3958  | 15  | 9373  | 10  | 7107  | 53 | 1   | 60  | -16 | -23 | 83  | 39  | Q16832 |        |
| 793 | PN093   | Tyrosine Hydroxylase | S71          | Tyrosine hydroxylase isoform a                                                                | 974   | 101 | 1984  | 21  | 1380  | 11  | 860   | 19  | 1026  | 22  | 1635  | 32  | 1464  | 31  | 2199  | 42 | 104 | 42  | -12 | 59  | 43  | 114 | P07101 |        |
| 794 | PN109   | Tyrosine Hydroxylase | S19          | Tyrosine hydroxylase isoform a                                                                | 2820  | 76  | 3834  | 54  | 4999  | 113 | 1962  | 70  | 3399  | 19  | 3501  | 8   | 2623  | 12  | 3355  | 17 | 36  | 77  | -30 | 3   | -23 | -1  | P07101 |        |
| 795 | NN154   | Ubiquitin            | Pan-specific | Ubiquitin                                                                                     | 9007  | 7   | 20711 | 29  | 9113  | 7   | 16272 | 65  | 7506  | 12  | 12108 | 26  | 8062  | 16  | 10550 | 64 | 130 | 1   | 70  | 61  | 7   | 41  | P62988 |        |
| 796 | PK110   | VEGFR2 (KDR)         | Y1054        | Vascular endothelial growth factor receptor-tyrosine kinase 2 (Flk1)                          | 23525 | 9   | 48070 | 6   | 14475 | 4   | 11732 | 1   | 15922 | 8   | 37633 | 24  | 16223 | 26  | 43539 | 18 | 104 | -38 | -50 | 136 | 2   | 173 | P35968 |        |
| 797 | PK133   | VEGFR2 (KDR)         | Y1214        | Vascular endothelial growth factor receptor-tyrosine kinase 2 (Flk1)                          | 1113  | 42  | 1825  | 53  | 1458  | 41  | 1168  | 85  | 4414  | 104 | 1833  | 39  | 1212  | 47  | 1244  | 38 | 64  | 31  | 5   | -58 | -73 | -72 | P35968 |        |
| 798 | NP030   | VHR                  | Pan-specific | Dual specificity protein phosphatase 3                                                        | 44548 | 7   | 43131 | 5   | 54477 | 2   | 30596 | 32  | 38827 | 2   | 46900 | 2   | 54556 | 1   | 47898 | 16 | -3  | 22  | -31 | 21  | 41  | 23  | P51452 |        |
| 799 | PN094   | Vimentin             | S33          | Vimentin                                                                                      | 3526  | 34  | 8616  | 12  | 4732  | 18  | 5906  | 62  | 6145  | 7   | 4251  | 51  | 4628  | 2   | 8086  | 56 | 144 | 144 | 34  | 68  | -31 | -25 | 32     | P08670 |
| 800 | NK184   | Vrk1                 | Pan-specific | Vaccinia related protein-serine kinase 1                                                      | 6355  | 27  | 17450 | 9   | 4031  | 117 | 14239 | 45  | 9421  | 77  | 7734  | 14  | 7789  | 173 | 7619  | 17 | 175 | -37 | 124 | -18 | -17 | -19 | Q99986 |        |
| 801 | NK185   | Wee1                 | Pan-specific | Wee1 protein-tyrosine kinase                                                                  | 4380  | 27  | 3794  | 51  | 4877  | 28  | 3140  | 68  | 4521  | 27  | 3925  | 33  | 2066  | 29  | 3715  | 62 | -13 | 12  | -28 | -13 | -54 | -18 | P30291 |        |
| 802 | NK037   | WIP1                 | Pan-specific | Protein phosphatase 1D                                                                        | 9653  | 11  | 6950  | 28  | 8451  | 2   | 8007  | 47  | 12208 | 5   | 11875 | 10  | 8656  | 1   | 8927  | 30 | -28 | -12 | -17 | -3  | -29 | -21 | Q15297 |        |
| 803 | NK186   | Yes                  | Pan-specific | Yamaguchi sarcoma proto-oncogene-encoded tyrosine kinase                                      | 17386 | 194 | 21364 | 24  | 12806 | 30  | 13636 | 152 | 12988 | 0   | 29147 | 16  | 11315 | 86  | 15224 | 81 | 23  | -26 | -22 | 124 | -13 | 17  | P07947 |        |
| 804 | NK186-2 | Yes                  | Pan-specific | Yamaguchi sarcoma proto-oncogene-encoded tyrosine kinase                                      | 39509 | 1   | 40225 | 1   | 48491 | 2   | 37355 | 39  | 35085 | 7   | 42910 | 5   | 48402 | 1   | 43958 | 5  | 2   | 23  | -5  | 22  | 38  | 25  | P07947 |        |
| 805 | NK214   | YSK1                 | Pan-specific | Serine/threonine-protein kinase 25                                                            | 15142 | 50  | 11388 | 42  | 15029 | 91  | 7582  | 12  | 15166 | 58  | 9999  | 72  | 5012  | 82  | 5841  | 23 | -25 | -1  | -50 | -34 | -67 | -61 | O00506 |        |
| 806 | NK187   | ZAP70                | Pan-specific | Zeta-chain (TCR) associated protein-tyrosine kinase, 70 kDa                                   | 45469 | 4   | 40319 | 8   | 46507 | 12  | 39962 | 21  | 35940 | 4   | 46845 | 0   | 53987 | 5   | 50665 | 27 | -11 | 2   | -12 | 28  | 50  | 41  | P43403 |        |
| 807 | NK187-2 | ZAP70                | Pan-specific | Zeta-chain (TCR) associated protein-tyrosine kinase, 70 kDa                                   | 7061  | 26  | 11615 | 61  | 6765  | 11  | 4598  | 20  | 9411  | 9   | 8047  | 17  | 2666  | 14  | 2005  | 36 | 64  | -4  | -35 | -14 | -72 | -79 | P43403 |        |
| 808 | PK112   | ZAP70                | Y292         | Zeta-chain (TCR) associated protein-tyrosine kinase, 70 kDa                                   | 31653 | 11  | 30497 | 13  | 27141 | 32  | 20841 | 51  | 26036 | 10  | 36026 | 11  | 27094 | 61  | 31061 | 3  | -4  | -14 | -34 | 38  | 4   | 19  | P43403 |        |
| 809 | PK113   | ZAP70                | Y315+Y319    | Zeta-chain (TCR) associated protein-tyrosine kinase, 70 kDa                                   | 38040 | 8   | 36552 | 2   | 44037 | 13  | 36628 | 19  | 30868 | 1   | 38183 | 2   | 46748 | 2   | 35358 | 27 | -4  | 16  | -4  | 24  | 51  | 15  | P43403 |        |
| 810 | PK109   | ZAP70/Syk            | Y319/Y352    | Zeta-chain (TCR) associated protein-tyrosine kinase, 70 kDa/Spleen protein-tyrosine kinase    | 1111  | 23  | 1129  | 37  | 1403  | 20  | 795   | 78  | 945   | 34  | 1014  | 17  | 1119  | 61  | 1259  | 10 | 2   | 26  | -28 | 7   | 18  | 33  | P43403 |        |
| 811 | NK188-1 | ZIPK                 | Pan-specific | ZIP kinase (death associated protein-serine kinase 3 (DAPK3))                                 | 22724 | 51  | 17219 | 11  | 19449 | 2   | 10016 | 7   | 19356 | 3   | 16438 | 1   | 8084  | 8   | 15788 | 47 | -24 | -14 | -56 | -15 | -58 | -18 | Q43293 |        |
| 812 | NK188-2 | ZIPK                 | Pan-specific | ZIP kinase (death associated protein-serine kinase 3 (DAPK3))                                 | 23082 | 5   | 26931 | 42  | 19653 | 22  | 17613 | 29  | 24975 | 17  | 23675 | 10  | 16873 | 9   | 25183 | 0  | 17  | -15 | -24 | -5  | -32 | 1   | Q43293 |        |
